# Supplementary material
Source: PubMed Central journal article supplement (PMC9898180)
Supplement: NIHMS1857122-supplement-Supplementary_Material.pdf [file NIHMS1857122-supplement-Supplementary_Material.pdf]

## **SUPPLEMENTARY INFORMATION**

### **Neoadjuvant PD-L1 versus PD-L1 plus CTLA-4 Blockade for Patients with Malignant Pleural Mesothelioma**

Hyun-Sung Lee, M.D., Ph.D.<sup>1</sup>, Hee-Jin Jang, M.D., Ph.D.<sup>1</sup>, Maheshwari Ramineni, M.D.<sup>2</sup>, Daniel Y. Wang, M.D.<sup>3</sup>, Daniela Ramos, B.S.<sup>1</sup>, Jong Min Choi, Ph.D.<sup>1</sup>, Taylor Splawn, M.P.H.<sup>1</sup>, Monica Espinoza, B.S.<sup>1</sup>, Michelle Almarez, B.S.<sup>1</sup>, Leandria Hosey, B.S.<sup>1</sup>, Eunji Jo, M.S.<sup>4</sup>, Susan Hilsenbeck, Ph.D.<sup>4</sup>, Christopher I. Amos, Ph.D.<sup>5</sup>, R. Taylor Ripley, M.D.<sup>6</sup>, Bryan M. Burt, M.D.<sup>1,\*</sup>

**Supplementary Table 1.** Representativeness of Study Participants.

|                                          |                                                                                                                                                                                                                                                                                                                                                                                                                                                                                                                                                                                                                      |
|------------------------------------------|----------------------------------------------------------------------------------------------------------------------------------------------------------------------------------------------------------------------------------------------------------------------------------------------------------------------------------------------------------------------------------------------------------------------------------------------------------------------------------------------------------------------------------------------------------------------------------------------------------------------|
| Cancer type/subtype/stage/condition      | Resectable malignant pleural mesothelioma (MPM) /all histologies                                                                                                                                                                                                                                                                                                                                                                                                                                                                                                                                                     |
| Considerations related to                |                                                                                                                                                                                                                                                                                                                                                                                                                                                                                                                                                                                                                      |
| Sex                                      | MPM is 4-5 times more prevalent in males and may be less biologically aggressive in females. Furthermore, differential patterns of gene expression have been associated with sex in MPM.                                                                                                                                                                                                                                                                                                                                                                                                                             |
| Age                                      | The risk of MPM increases with age. MPM can occur in young people (even children), but it's rare in people under age 45. About 2 out of 3 people with MPM are 65 or older. The average age for a MPM diagnosis is 72.                                                                                                                                                                                                                                                                                                                                                                                                |
| Race/ethnicity                           | MPM is more common in White and Hispanic people than in Asian American or African American people.                                                                                                                                                                                                                                                                                                                                                                                                                                                                                                                   |
| Geography                                | Although MPM is a fairly rare disease (0.6% of annual cancer deaths), its worldwide incidence and mortality are projected to rise due to continued asbestos exposure from manufacturing, accidents, and abatement. Approximately 3,500 patients are diagnosed with MPM in the U.S. annually, and its incidence is expected to peak around 85,000 deaths in the U.S. alone in the 2020s-50s. Texas has the 4th highest death rate from MPM in the nation. The public health hazard in the U.S. persists in incidents ranging from asbestos-abatement projects to the 9/11/2001 destruction of the World Trade Center. |
| Other considerations                     | MPM is an aggressive lethal, malignancy. Few effective treatments exist for MPM and its 5-year mortality is greater than 90%. The most common etiology of MPM is industrial/environmental exposure to asbestos (~80%).                                                                                                                                                                                                                                                                                                                                                                                               |
| Overall representativeness of this study | The mean age at the time of enrollment of this trial is around 64 years old. Our study population was limited to our institution's main site in Houston, TX. The MPM distribution of ethnic and racial categories mirrors the demographic data in our center, i.e. approximately 90% White subjects (including 5% Hispanic subjects), 5% Black or African American subjects, and 3% Asian subjects. In aggregate, the other minority groups account for 2% of our patient population.                                                                                                                                |

**Supplementary Table 2.** Preoperative adverse events, defined as AEs observed after ICB and before surgery.

| Grade                              | Durva<br>(N=9) |   |   | Durva+Treme<br>(N=11) |   |   | Any |
|------------------------------------|----------------|---|---|-----------------------|---|---|-----|
|                                    | 1              | 2 | 3 | 1                     | 2 | 3 | Any |
| Acute kidney injury                | 0              | 0 | 0 | 1                     | 0 | 0 | 1   |
| Alanine aminotransferase increased | 1              | 0 | 0 | 1                     | 0 | 0 | 2   |
| Alkaline phosphatase increased     | 1              | 0 | 0 | 0                     | 0 | 0 | 1   |
| Anemia                             | 2              | 0 | 0 | 3                     | 1 | 0 | 6   |
| Anorexia                           | 0              | 0 | 1 | 0                     | 0 | 0 | 1   |
| Back pain                          | 1              | 1 | 0 | 0                     | 0 | 0 | 2   |
| Chest wall pain                    | 1              | 0 | 0 | 1                     | 0 | 0 | 2   |
| Chronic kidney disease             | 0              | 1 | 0 | 0                     | 0 | 0 | 1   |
| Cough                              | 0              | 0 | 0 | 1                     | 0 | 0 | 1   |
| Dizziness                          | 0              | 0 | 0 | 1                     | 0 | 0 | 1   |
| Dyspepsia                          | 1              | 0 | 0 | 0                     | 0 | 0 | 1   |
| Dyspnea                            | 2              | 0 | 1 | 0                     | 0 | 1 | 4   |
| Edema limbs                        | 0              | 0 | 1 | 0                     | 0 | 0 | 1   |
| Fatigue                            | 1              | 0 | 1 | 3                     | 0 | 0 | 5   |
| Fever                              | 0              | 0 | 0 | 0                     | 1 | 0 | 1   |
| Hematuria                          | 0              | 0 | 0 | 3                     | 0 | 0 | 3   |
| Hepatitis                          | 0              | 0 | 0 | 0                     | 0 | 1 | 1   |
| Hyperglycemia                      | 3              | 0 | 0 | 4                     | 0 | 2 | 9   |
| Hyperkalemia                       | 0              | 0 | 0 | 1                     | 0 | 0 | 1   |
| Hypermagnesemia                    | 1              | 0 | 0 | 0                     | 0 | 0 | 1   |
| Hypoalbuminemia                    | 0              | 0 | 0 | 1                     | 0 | 0 | 1   |
| Hypocalcemia                       | 0              | 0 | 0 | 1                     | 0 | 0 | 1   |
| Hypomagnesemia                     | 0              | 0 | 0 | 2                     | 0 | 0 | 2   |
| Hyponatremia                       | 0              | 0 | 0 | 1                     | 0 | 0 | 1   |
| Hypothyroidism                     | 0              | 0 | 0 | 1                     | 0 | 0 | 1   |
| Leukocytosis                       | 1              | 0 | 0 | 1                     | 1 | 0 | 3   |
| Lymphocyte count decreased         | 0              | 0 | 0 | 1                     | 0 | 0 | 1   |
| Myocardial Infarction              | 0              | 0 | 0 | 0                     | 0 | 1 | 1   |
| Nausea                             | 1              | 1 | 0 | 1                     | 0 | 0 | 3   |
| Pain                               | 0              | 0 | 0 | 1                     | 0 | 0 | 1   |
| Pleural effusion                   | 0              | 0 | 0 | 0                     | 1 | 0 | 1   |
| Prolonged aPTT                     | 1              | 0 | 0 | 0                     | 0 | 0 | 1   |
| Rash acneiform                     | 0              | 0 | 0 | 0                     | 0 | 1 | 1   |

|                               |      |      |      |      |      |      |    |
|-------------------------------|------|------|------|------|------|------|----|
| Salivary duct inflammation    | 0    | 0    | 0    | 1    | 0    | 0    | 1  |
| Sinus Bradycardia             | 1    | 0    | 0    | 0    | 0    | 0    | 1  |
| Sore throat                   | 0    | 0    | 0    | 1    | 0    | 0    | 1  |
| <b>Total AEs</b>              | 18   | 4    | 4    | 31   | 4    | 6    | 60 |
| <b>Total participants</b>     | 6    | 3    | 1    | 6    | 2    | 3    | 14 |
| <b>Total participants (%)</b> | 66.7 | 33.3 | 11.1 | 54.5 | 18.2 | 27.3 | 70 |

AEs, adverse events; aPTT, activated partial thromboplastin time.

**Supplementary Table 3.** Postoperative 30-day adverse events (AEs) observed after surgery.

| Arm                                  | No ICB<br>(N=4) |   |   |   |   | Durvalumab<br>(N=8) |   |   |   |   | Durva + Treme<br>(N=9) |   |   |   |   | Any |
|--------------------------------------|-----------------|---|---|---|---|---------------------|---|---|---|---|------------------------|---|---|---|---|-----|
|                                      | 1               | 2 | 3 | 4 | 5 | 1                   | 2 | 3 | 4 | 5 | 1                      | 2 | 3 | 4 | 5 | Any |
| Abdominal pain                       | 1               | 0 | 0 | 0 | 0 | 0                   | 0 | 0 | 0 | 0 | 0                      | 0 | 0 | 0 | 0 | 1   |
| Acidosis                             | 0               | 0 | 0 | 0 | 0 | 1                   | 0 | 1 | 0 | 0 | 0                      | 0 | 0 | 0 | 0 | 2   |
| Acute coronary syndrome              | 0               | 0 | 0 | 0 | 0 | 0                   | 0 | 0 | 1 | 0 | 0                      | 0 | 0 | 0 | 0 | 1   |
| Acute kidney injury                  | 1               | 0 | 1 | 0 | 0 | 0                   | 0 | 0 | 1 | 0 | 0                      | 0 | 0 | 0 | 0 | 3   |
| Alanine aminotransferase increased   | 0               | 1 | 0 | 0 | 0 | 1                   | 0 | 0 | 1 | 0 | 0                      | 1 | 0 | 0 | 0 | 4   |
| Alkaline phosphatase increased       | 2               | 0 | 0 | 0 | 0 | 0                   | 1 | 0 | 0 | 0 | 0                      | 0 | 0 | 0 | 0 | 3   |
| Anemia                               | 3               | 0 | 1 | 1 | 0 | 4                   | 0 | 1 | 0 | 0 | 2                      | 0 | 0 | 0 | 0 | 12  |
| Anorexia                             | 2               | 1 | 0 | 0 | 0 | 0                   | 0 | 0 | 0 | 0 | 0                      | 0 | 0 | 0 | 0 | 3   |
| Anxiety                              | 1               | 1 | 0 | 0 | 0 | 0                   | 0 | 0 | 0 | 0 | 0                      | 0 | 0 | 0 | 0 | 2   |
| aPTT prolonged                       | 0               | 0 | 0 | 0 | 0 | 1                   | 0 | 0 | 0 | 0 | 0                      | 0 | 0 | 0 | 0 | 1   |
| Aspartate aminotransferase increased | 1               | 0 | 0 | 0 | 0 | 2                   | 0 | 0 | 1 | 0 | 0                      | 0 | 0 | 0 | 0 | 4   |
| Atrial fibrillation                  | 0               | 1 | 0 | 0 | 0 | 0                   | 1 | 0 | 0 | 0 | 0                      | 0 | 0 | 0 | 0 | 2   |
| Blood bilirubin increased            | 0               | 0 | 0 | 0 | 0 | 1                   | 1 | 0 | 0 | 0 | 0                      | 0 | 0 | 0 | 0 | 2   |
| Breast pain                          | 0               | 0 | 0 | 0 | 0 | 1                   | 0 | 0 | 0 | 0 | 0                      | 0 | 0 | 0 | 0 | 1   |
| Chest wall pain                      | 1               | 0 | 0 | 0 | 0 | 0                   | 1 | 0 | 0 | 0 | 0                      | 1 | 0 | 0 | 0 | 3   |
| Chronic kidney disease               | 0               | 0 | 0 | 0 | 0 | 0                   | 0 | 0 | 0 | 0 | 0                      | 1 | 0 | 0 | 0 | 1   |
| Constipation                         | 1               | 0 | 0 | 0 | 0 | 2                   | 1 | 0 | 0 | 0 | 1                      | 0 | 0 | 0 | 0 | 5   |
| Cough                                | 1               | 0 | 0 | 0 | 0 | 0                   | 0 | 0 | 0 | 0 | 0                      | 0 | 0 | 0 | 0 | 1   |
| Creatinine increased                 | 0               | 0 | 0 | 0 | 0 | 2                   | 1 | 0 | 0 | 0 | 0                      | 0 | 0 | 0 | 0 | 3   |
| Death                                | 0               | 0 | 0 | 0 | 0 | 0                   | 0 | 0 | 0 | 1 | 0                      | 0 | 0 | 0 | 0 | 1   |
| Delirium                             | 0               | 0 | 0 | 0 | 0 | 0                   | 0 | 0 | 0 | 0 | 1                      | 0 | 0 | 0 | 0 | 1   |
| Dysphagia                            | 1               | 0 | 0 | 0 | 0 | 0                   | 0 | 0 | 0 | 0 | 0                      | 0 | 0 | 0 | 0 | 1   |
| Dyspnea                              | 1               | 0 | 0 | 0 | 0 | 1                   | 0 | 0 | 0 | 0 | 0                      | 0 | 0 | 0 | 0 | 2   |
| Edema limbs                          | 0               | 0 | 0 | 0 | 0 | 1                   | 1 | 0 | 0 | 0 | 0                      | 1 | 0 | 0 | 0 | 3   |
| Fall injury                          | 0               | 0 | 1 | 0 | 0 | 0                   | 0 | 0 | 0 | 0 | 0                      | 0 | 0 | 0 | 0 | 1   |
| Fatigue                              | 2               | 1 | 0 | 0 | 0 | 0                   | 0 | 0 | 0 | 0 | 0                      | 0 | 0 | 0 | 0 | 3   |
| Fever                                | 0               | 0 | 0 | 0 | 0 | 1                   | 0 | 0 | 0 | 0 | 0                      | 0 | 0 | 0 | 0 | 1   |
| Fibrinogen decreased                 | 0               | 0 | 0 | 0 | 0 | 1                   | 0 | 0 | 0 | 0 | 0                      | 0 | 0 | 0 | 0 | 1   |
| Heart failure                        | 0               | 0 | 0 | 1 | 0 | 0                   | 0 | 0 | 1 | 0 | 0                      | 0 | 0 | 0 | 0 | 2   |
| Hyperglycemia                        | 3               | 1 | 0 | 0 | 0 | 3                   | 1 | 0 | 0 | 0 | 0                      | 0 | 0 | 0 | 0 | 8   |
| Hyperkalemia                         | 0               | 0 | 0 | 0 | 0 | 0                   | 0 | 0 | 0 | 0 | 0                      | 1 | 0 | 0 | 0 | 1   |
| Hypernatremia                        | 1               | 0 | 0 | 0 | 0 | 1                   | 0 | 0 | 0 | 0 | 0                      | 0 | 0 | 0 | 0 | 2   |

|                               |     |     |    |    |   |    |    |    |    |    |      |      |   |   |   |      |
|-------------------------------|-----|-----|----|----|---|----|----|----|----|----|------|------|---|---|---|------|
| Hypoalbuminemia               | 0   | 0   | 0  | 0  | 0 | 1  | 0  | 0  | 0  | 0  | 0    | 0    | 0 | 0 | 0 | 1    |
| Hypocalcemia                  | 0   | 0   | 0  | 0  | 0 | 2  | 0  | 0  | 0  | 0  | 1    | 0    | 0 | 0 | 0 | 3    |
| Hyponatremia                  | 0   | 0   | 0  | 0  | 0 | 1  | 0  | 0  | 0  | 0  | 1    | 0    | 0 | 0 | 0 | 2    |
| Hypotension                   | 2   | 0   | 1  | 0  | 0 | 0  | 1  | 1  | 0  | 0  | 0    | 0    | 0 | 0 | 0 | 5    |
| Hypoxia                       | 0   | 0   | 0  | 0  | 0 | 0  | 0  | 0  | 0  | 0  | 0    | 1    | 0 | 0 | 0 | 1    |
| Insomnia                      | 1   | 0   | 0  | 0  | 0 | 0  | 0  | 0  | 0  | 0  | 0    | 0    | 0 | 0 | 0 | 1    |
| Mucosal infection             | 1   | 0   | 0  | 0  | 0 | 0  | 0  | 0  | 0  | 0  | 0    | 0    | 0 | 0 | 0 | 1    |
| Multi-organ failure           | 0   | 0   | 0  | 0  | 0 | 0  | 0  | 0  | 1  | 0  | 0    | 0    | 0 | 0 | 0 | 1    |
| Nausea                        | 1   | 0   | 0  | 0  | 0 | 1  | 1  | 0  | 0  | 0  | 0    | 0    | 0 | 0 | 0 | 3    |
| Neck pain                     | 1   | 0   | 0  | 0  | 0 | 0  | 0  | 0  | 0  | 0  | 0    | 0    | 0 | 0 | 0 | 1    |
| Paresthesia                   | 1   | 0   | 0  | 0  | 0 | 0  | 0  | 0  | 0  | 0  | 0    | 0    | 0 | 0 | 0 | 1    |
| Platelet count decreased      | 0   | 0   | 0  | 0  | 0 | 1  | 1  | 0  | 0  | 0  | 0    | 0    | 0 | 0 | 0 | 2    |
| Pleural effusion              | 1   | 0   | 0  | 0  | 0 | 0  | 0  | 0  | 0  | 0  | 0    | 0    | 0 | 0 | 0 | 1    |
| Respiratory failure           | 0   | 0   | 0  | 0  | 0 | 0  | 0  | 0  | 1  | 0  | 0    | 0    | 0 | 0 | 0 | 1    |
| Restlessness                  | 1   | 0   | 0  | 0  | 0 | 0  | 0  | 0  | 0  | 0  | 0    | 0    | 0 | 0 | 0 | 1    |
| Skin infection                | 0   | 1   | 0  | 0  | 0 | 0  | 0  | 0  | 0  | 0  | 0    | 0    | 0 | 0 | 0 | 1    |
| Syncope                       | 0   | 0   | 1  | 0  | 0 | 0  | 0  | 0  | 0  | 0  | 0    | 0    | 0 | 0 | 0 | 1    |
| Urine output decreased        | 0   | 1   | 0  | 0  | 0 | 0  | 0  | 0  | 0  | 0  | 0    | 0    | 0 | 0 | 0 | 1    |
| Ventricular tachycardia       | 0   | 1   | 0  | 0  | 0 | 1  | 0  | 0  | 0  | 0  | 1    | 0    | 0 | 0 | 0 | 3    |
| Weight gain                   | 0   | 0   | 0  | 0  | 0 | 0  | 0  | 0  | 0  | 0  | 0    | 1    | 0 | 0 | 0 | 1    |
| Weight loss                   | 1   | 0   | 0  | 0  | 0 | 0  | 0  | 0  | 0  | 0  | 0    | 0    | 0 | 0 | 0 | 1    |
| White blood cell decreased    | 0   | 1   | 0  | 0  | 0 | 1  | 0  | 0  | 0  | 0  | 0    | 0    | 0 | 0 | 0 | 2    |
| <b>Total AEs</b>              | 31  | 10  | 5  | 2  | 0 | 31 | 11 | 3  | 7  | 1  | 7    | 7    | 0 | 0 | 0 | 115  |
| <b>Total participants</b>     | 4   | 4   | 3  | 1  | 0 | 6  | 4  | 1  | 1  | 1  | 4    | 4    | 0 | 0 | 0 | 16   |
| <b>Total participants (%)</b> | 100 | 100 | 75 | 25 | 0 | 75 | 50 | 25 | 25 | 25 | 44.4 | 44.4 | 0 | 0 | 0 | 76.2 |

AEs, adverse events; aPTT, activated partial thromboplastin time; LFT, liver function test.

**Supplementary Table 4.** Univariable analysis of variables associated with pathologic response and overall survival following neoadjuvant ICB (N=17).

| Variable                                            | Pathologic Response  |              | Overall Survival       |              |
|-----------------------------------------------------|----------------------|--------------|------------------------|--------------|
|                                                     | Odds ratio (95% CIs) | P value      | Hazard ratio (95% CIs) | P value      |
| <b>Age</b>                                          |                      | 1.0          |                        | 0.519        |
| ≤65 years old                                       | 1                    |              | 1                      |              |
| >65 years old                                       | 1.143 (0.141-9.289)  |              | 1.561 (0.403-6.055)    |              |
| <b>Gender</b>                                       |                      | 1.000        |                        | 0.532        |
| Female                                              | 1                    |              | 1                      |              |
| Male                                                | 1.876 (0.150-23.26)  |              | 1.642 (0.347-7.752)    |              |
| <b>Asbestos exposure</b>                            |                      | 0.889        |                        | 0.499        |
| No                                                  | 1                    |              | 1                      |              |
| Yes                                                 | 0.857 (0.098-7.510)  |              | 0.643 (0.179-2.313)    |              |
| <b>Clinical stage</b>                               |                      | 0.600        |                        | 0.194        |
| I                                                   | 1                    |              | 1                      |              |
| II                                                  | 0.350 (0.029-4.153)  |              | 2.332 (0.649-8.381)    |              |
| <b>Histology</b>                                    |                      | 0.644        |                        | 0.417        |
| Epithelioid                                         | 1                    |              | 1                      |              |
| Non-epithelioid                                     | 1.75 (0.233-13.159)  |              | 1.614 (0.482-5.819)    |              |
| <b>Tumor PD-L1</b>                                  |                      | <b>0.035</b> |                        | 0.181        |
| ≤5%                                                 | 1                    |              | 1                      |              |
| >5%                                                 | 2.747 (1.258-6.024)  |              | 2.900 (0.609-13.812)   |              |
| <b>SUVmax</b>                                       | 0.814 (0.557-1.190)  | 0.288        | 1.042 (0.964-1.127)    | 0.296        |
| <b>Neoadjuvant ICB</b>                              |                      | 1.000        |                        | <b>0.041</b> |
| Monotherapy                                         | 1                    |              | 1                      |              |
| Combination therapy                                 | 0.833 (0.114-6.111)  |              | 0.247 (0.065-0.940)    |              |
| <b>irAEs</b>                                        |                      | 0.333        |                        | 0.594        |
| No                                                  | 1                    |              | 1                      |              |
| Yes                                                 | 4.167 (0.358-48.44)  |              | 1.448 (0.371-5.652)    |              |
| <b>Pretreatment CD8 (%)</b>                         | 0.865 (0.671-1.117)  | 0.267        | 1.031 (0.906-1.173)    | 0.648        |
| <b>Posttreatment CD8 (%)</b>                        | 0.981 (0.814-1.183)  | 0.841        | 1.003 (0.887-1.135)    | 0.959        |
| <b>Pretreatment Treg (%)</b>                        | 1.322 (0.739-2.363)  | 0.346        | 0.810 (0.543-1.208)    | 0.301        |
| <b>Posttreatment Treg (%)</b>                       | 1.189 (0.791-1.788)  | 0.405        | 1.091 (0.914-1.301)    | 0.335        |
| <b>Pretreatment CD8/Treg ratio</b>                  | 0.463 (0.174-1.229)  | 0.122        | 1.021 (0.902-1.155)    | 0.744        |
| <b>Posttreatment CD8/Treg ratio</b>                 | 0.968 (0.876-1.069)  | 0.519        | 0.990 (0.932-1.053)    | 0.759        |
| <b>Pretreatment TLS density&gt;1/μm<sup>2</sup></b> | 2.000 (1.112-4.452)  | <b>0.044</b> | 0.354 (0.044-2.844)    | 0.329        |
| <b>Posttreatment TLS</b>                            | 12.788 (1.315-       | <b>0.028</b> | 1.659 (0.440-6.253)    | 0.455        |

|                                                               |          |   |                           |              |
|---------------------------------------------------------------|----------|---|---------------------------|--------------|
| <b>density&gt;1/<math>\mu\text{m}^2</math></b>                | 124.396) |   |                           |              |
| <b>Pathologic response</b><br>(viable tumor<80%)<br>No<br>Yes | -        | - | 1<br>1.425 (0.400-5.072)  | 0.585        |
| <b>Residual viable tumor</b><br>(%)                           | -        | - | 1.002 (0.984-1.024)       | 0.802        |
| <b>ypStage</b><br>0 or 1<br>Others                            | -        | - | 1<br>1.072 (0.300-3.829)  | 0.914        |
| <b>Operative procedure</b><br>Others<br>EPP                   | -        | - | 1<br>6.315 (1.259-31.671) | <b>0.025</b> |
| <b>Intraoperative transfusion</b><br>No<br>Yes                | -        | - | 1<br>0.879 (0.247-3.131)  | 0.842        |
| <b>HIOC</b><br>No<br>Yes                                      | -        | - | 1<br>1.823 (0.522-6.364)  | 0.347        |
| <b>Macroscopic complete resection</b><br>No<br>Yes            | -        | - | 1<br>0.401 (0.113-1.417)  | 0.156        |
| <b>Adjuvant chemotherapy</b><br>No<br>Yes                     | -        | - | 1<br>0.253 (0.062-1.028)  | <b>0.055</b> |
| <b>Adjuvant radiotherapy</b><br>No<br>Yes                     | -        | - | 1<br>1.107 (0.139-8.827)  | 0.923        |

EPP, extrapleural pneumonectomy; HIOC, heated intraoperative chemotherapy; irAEs, immunotherapy-related adverse events; TLS, tertiary lymphoid structures.



**Supplementary Table 5.** IMC antibody panel relevant to Figure 1 and Figure 3.

| No | PRODUCT           | TAG   | TARGET      | CLONE                            | reactivity  | PRODUCT #   |
|----|-------------------|-------|-------------|----------------------------------|-------------|-------------|
| 1  | CD38 141Pr        | 141Pr | CD38        | EPR4106                          | human       | 3141018D    |
| 2  | CD19 142Nd        | 142Nd | CD19        | 6OMP31                           | cross       | 3142014D    |
| 3  | Vimentin 143Nd    | 143Nd | Vimentin    | D21H3                            | cross       | 3143027D    |
| 4  | TGFBI 144Nd       | 144Nd | TGFBI       | 310-390 C-terminal <sup>aa</sup> | human       | LS-B14346   |
| 5  | CTLA-4 145Nd      | 145Nd | CTLA-4      |                                  | human       | A2001       |
| 6  | CD16 146Nd        | 146Nd | CD16        | EPR16784                         | human       | 3146020D    |
| 7  | CD163 147Sm       | 147Sm | CD163       | EDHu-1                           | human       | 3147021D    |
| 8  | Pan-Keratin 148Nd | 148Nd | Pan-Keratin | C11                              | human       | 3148020D    |
| 9  | CD11b 149Sm       | 149Sm | CD11b       | EPR1344                          | human/mouse | 3149028D    |
| 10 | CD278 150Nd       | 150Nd | CD278       | SP98                             | human       | ab236226    |
| 11 | CD31 151Eu        | 151Eu | CD31        | EPR3094                          | human       | 3151025D    |
| 12 | CD45 152Sm        | 152Sm | CD45        | CD45-2B11                        | human       | 3152016D    |
| 13 | CD44 153Eu        | 153Eu | CD44        | IM7                              | human/mouse | 3153029D    |
| 14 | CD11c 154Sm       | 154Sm | CD11c       | Polyclonal                       | human       | 3154025D    |
| 15 | FoxP3 155Gd       | 155Gd | FoxP3       | 236A/E7                          | human       | 3155016D    |
| 16 | CD4 156Gd         | 156Gd | CD4         | EPR6855                          | human       | 3156033D    |
| 17 | E-Cadherin 158Gd  | 158Gd | E-Cadherin  | 24E10                            | cross       | 3158029D    |
| 18 | CD68 159Tb        | 159Tb | CD68        | KP1                              | human       | 3159035D    |
| 19 | Vista 160Gd       | 160Gd | Vista       | D1L2G                            | human       | 3160025D    |
| 20 | CD20 161Dy        | 161Dy | CD20        | H1                               | human       | 3161029D    |
| 21 | CD8a 162Dy        | 162Dy | CD8a        | C8/144B                          | human       | 3162034D    |
| 22 | PD-L1 163Dy       | 163Dy | PD-L1       |                                  | human       | conjugated  |
| 23 | c-Myc p67 164Dy   | 164Dy | C-Myc p67   | 9E10                             | human       | 3164025D    |
| 24 | PD-1 165Ho        | 165Ho | PD-1        |                                  | human       | conjugated  |
| 25 | CD45RA 166Er      | 166Er | CD45RA      | HI100                            | human       | 3166028D    |
| 26 | Granzyme B 167Er  | 167Er | Granzyme B  | EPR20129-217                     | human       | 3167021D    |
| 27 | Ki-67 168Er       | 168Er | Ki-67       | B56                              | cross       | 3168022D    |
| 28 | IL-10 169Er       | 169Er | IL-10       |                                  | human       | conjugated  |
| 29 | CD3 170Er         | 170Er | CD3         | Polyclonal, C-Terminal           | human       | 3170019D    |
| 30 | CD27 171Yb        | 171Yb | CD27        | EPR8569                          | human       | 3171024D    |
| 31 | CX3CR1 172Yb      | 172Yb | CX3CR1      | 2A9-1                            | human       | 3172017B    |
| 32 | CD45RO 173Yb      | 173Yb | CD45RO      | UCHL1                            | human       | 3173016D    |
| 33 | HLA-DR 174Yb      | 174Yb | HLA-DR      | YE2/36 HLK                       | human       | 3174023D    |
| 34 | CD86 175Lu        | 175Lu | CD86        | BU63                             | human/mouse | ab213044    |
| 35 | Lysozyme 176Yb    | 176Yb | Lyz         | EPR2994(2)                       | human/mouse | ab185129    |
| 36 | Intercalator-Ir   | 191Ir | nucleus     |                                  |             | SKU 201192B |

**Supplementary Table 6.** CyTOF antibody panel for PBMC, relevant to Figure 4.

| No | PRODUCT                  | TAG   | TARGET       | CLONE      | reactivity  | Source       | PRODUCT #      |
|----|--------------------------|-------|--------------|------------|-------------|--------------|----------------|
| 1  | CD45 89Y                 | 89Y   | CD45         | HI30       | human       | DVS-Fluidigm | 3089003B       |
| 2  | CD57 115In               | 115In | CD57         | HCD57      | human       | BioLegend    | 322325         |
| 3  | IdU I127                 | 127I  | S-phase      |            | DNA         | Sigma        | I7125-5G       |
| 4  | CD56 139La<br>(NCAM16.2) | 139La | CD56         | NCAM16.2   | human       | BD           | 559043         |
| 5  | HLA ABC 141Pr            | 141Pr | HLA ABC      | W6/32      | human       | DVS-Fluidigm | 3141010B       |
| 6  | CD19 142Nd               | 142Nd | CD19         | HIB19      | human       | DVS-Fluidigm | 3142001B       |
| 7  | CD5 143Nd                | 143Nd | CD5          | UCHT2      | human       | DVS-Fluidigm | 3143007B       |
| 8  | CD11b 144Nd              | 144Nd | CD11b        | ICRF44     | human       | DVS-Fluidigm | 3144001B       |
| 9  | CD4 145Nd                | 145Nd | CD4          | RPA-T4     | human       | DVS-Fluidigm | 3145001B       |
| 10 | CD8a 146Nd               | 146Nd | CD8a         | RPA-T8     | human       | DVS-Fluidigm | 3146001B       |
| 11 | CD20 147Sm               | 147Sm | CD20         | 2H7        | human       | DVS-Fluidigm | 3147001B       |
| 12 | CD27 148Nd               | 148Nd | CD27         | LG.3A10    | human/mouse | BioLegend    | 124202         |
| 13 | CD45RO 149Sm             | 149Sm | CD45RO       | UCHL1      | human       | DVS-Fluidigm | 3149001B       |
| 14 | CD11c 150Nd              | 150Nd | CD11c        | Bu15       | human       | BioLegend    | 337221         |
| 15 | CD123 151Eu              | 151Eu | CD123        | 6H6        | human       | DVS-Fluidigm | 3151001B       |
| 16 | CD21 152Sm               | 152Sm | CD21         | BL13       | human       | DVS-Fluidigm | 3152010B       |
| 17 | CD272 153Eu              | 153Eu | CD272, BTLA  | J168-540   | human       | BD           | 558485(custom) |
| 18 | CD28 154Sm               | 154Sm | CD28         | CD28.2     | human       | BioLegend    | 302937         |
| 19 | CD278 155Gd              | 155Gd | CD278, ICOS  | C398.4A    | human/mouse | BioLegend    | 313502         |
| 20 | CD86 156Gd               | 156Gd | CD86         | IT2.2      | human       | DVS-Fluidigm | 3156008B       |
| 21 | CD25 158Gd               | 158Gd | CD25         | BC96       | human       | BioLegend    | 302602         |
| 22 | CCR7(CD197) 159Tb        | 159Tb | CD197, CCR7  | G043H7     | human       | DVS-Fluidigm | 3159003A       |
| 23 | CD279 (PD-1) 160Gd       | 160Gd | CD279, PD-1  | PD1.3.1.3  | human       | Miltenyi     | 130-096-168    |
| 24 | CD152 (CTLA-4) 161Dy     | 161Dy | CD152        | 14D3       | human       | DVS-Fluidigm | 3161004B       |
| 25 | FoxP3 162Dy              | 162Dy | FoxP3        | 259D/C7    | human       | DVS-Fluidigm | 3162024A       |
| 26 | CD45RA 163Dy             | 163Dy | CD45RA       | HI100      | human       | BioLegend    | 304102         |
| 27 | TIM-3/Fc 164Dy           | 164Dy | TIM-3/Fc     |            | human       | R&D          | 2365-TM-050    |
| 28 | CD40 165Ho               | 165Ho | CD40         | 5C3        | human       | DVS-Fluidigm | 3165005B       |
| 29 | Arginase-1 166Er         | 166Er | Arginase-1   | Polyclonal | human/mouse | DVS-Fluidigm | 3166023B       |
| 30 | CD38 167Er               | 167Er | CD38         | HIT2       | human       | DVS-Fluidigm | 3167001B       |
| 31 | CD154 (CD40L) 168Er      | 168Er | CD154, CD40L | 24-31      | human       | DVS-Fluidigm | 3168006B       |
| 32 | CD161 169Tm              | 169Tm | CD161        | HP-3G10    | human       | BioLegend    | 339902         |
| 33 | CD3 170Er                | 170Er | CD3          | UCHT1      | human       | DVS-Fluidigm | 3170001B       |
| 34 | CD68 171Yb               | 171Yb | CD68         | Y1/82A     | human       | DVS-Fluidigm | 3171011B       |

|    |                     |       |                |         |       |              |             |
|----|---------------------|-------|----------------|---------|-------|--------------|-------------|
| 35 | CD274 (PD-L1) 172Yb | 172Yb | CD274, PD-L1   | 29E.2A3 | human | BioLegend    | 329702      |
| 36 | CD14 173Yb          | 173Yb | CD14           | HCD14   | human | BioLegend    | 325602      |
| 37 | HLA-DR 174Yb        | 174Yb | HLA-DR         | L243    | human | BioLegend    | 307602      |
| 38 | LAG-3 175Lu         | 175Lu | CD223/LAG-3    | 11C3C65 | human | DVS-Fluidigm | 3175033B    |
| 39 | Ki67 176Yb          | 176Yb | Ki67           | A019D5  | human | BioLegend    | 350502      |
| 40 | CD16 209Bi          | 209Bi | CD16           | 3G8     | human | DVS-Fluidigm | 3209002B    |
| 41 | Intercalator-Ir     | 191Ir | nucleus        |         |       | DVS-Fluidigm | SKU 201192B |
| 42 | Cisplatin-198Pt     | 198Pt | Cell viability |         |       | DVS-Fluidigm | SKU 201198  |

**Supplementary Table 7.** CyTOF antibody panel for PBMC, BMDC, and tumor-infiltrating immune cells, relevant to Figure 4 and Figure 5.

| No | PRODUCT                  | TAG   | TARGET             | CLONE     | reactivity  | Source           | PRODUCT #   |
|----|--------------------------|-------|--------------------|-----------|-------------|------------------|-------------|
| 1  | CD57 115In               | 115Ln | CD57               | HCD57     | human       | BioLegend        | 322325      |
| 2  | IdU 1127                 | 127I  | IdU127             |           | DNA         | Sigma            | 17125-5G    |
| 3  | CD56 139La<br>(NCAM16.2) | 139La | CD56               | NCAM16.2  | human       | BD               | 559043      |
| 4  | EpCAM 141Pr              | 141Pr | CD326(EpCAM)       | 9C4       | human       | DVS-<br>Fluidigm | 3141006B    |
| 5  | CD19 142Nd               | 142Nd | CD19               | HIB19     | human       | BioLegend        | 302202      |
| 6  | CD117 143Nd              | 143Nd | CD117              | 104D2     | human       | DVS-<br>Fluidigm | 3143001B    |
| 7  | CD11b 144Nd              | 144Nd | CD11b              | ICRF44    | human       | DVS-<br>Fluidigm | 3144001B    |
| 8  | CD4 145Nd                | 145Nd | CD4                | RPA-T4    | human       | BioLegend        | 300502      |
| 9  | CD8a 146Nd               | 146Nd | CD8a               | RPA-T8    | human       | DVS-<br>Fluidigm | 3146001B    |
| 10 | CD278 147Sm              | 147Sm | CD278(ICOS)        | C398.4A   | human/mouse | BioLegend        | 313502      |
| 11 | CD27 148Nd               | 148Nd | CD27               | LG.3A10   | human       | Biolegend        | 3147001B    |
| 12 | CD200 149Sm              | 149Sm | CD200              | OX-104    | human       | DVS-<br>Fluidigm | 3149007B    |
| 13 | CD86 150Nd               | 150Nd | CD86               | IT2.2     | human       | DVS-<br>Fluidigm | 3150020B    |
| 14 | CD123 151Eu              | 151Eu | CD123              | 6H6       | human       | DVS-<br>Fluidigm | 3151001B    |
| 15 | TCRgd 152Sm              | 152Sm | TCRgd              | 11F2      | human       | DVS-<br>Fluidigm | 3152008B    |
| 16 | Pan-CK 153Eu             | 153Eu | Cytokeratin(pan)   | C-11      | human       | BioLegend        | 628602      |
| 17 | CD45 154Sm               | 154Sm | CD45               | HI30      | human       | DVS-<br>Fluidigm | 3154001B    |
| 18 | CD25 155Gd               | 155Gd | CD25               | M-A251    | human       | BD               | 555430      |
| 19 | Vimentin 156Gd           | 156Gd | Vimentin           | RV202     | cross       | DVS-<br>Fluidigm | 3156023A    |
| 20 | CD324 158Gd              | 158Gd | CD324 (E-cadherin) | DECMA-1   | human       | DVS-<br>Fluidigm | 3158018B    |
| 21 | CD11c 159Tb              | 159Tb | CD11c              | Bu15      | human       | DVS-<br>Fluidigm | 3159001B    |
| 22 | CD279 (PD-1)<br>160Gd    | 160Gd | CD279(PD1)         | PD1.3.1.3 | human       | Miltenyi         | 130-096-168 |
| 23 | CD152 (CTLA-4)<br>161Dy  | 161Dy | CD152(CTLA-4)      | 14D3      | human       | DVS-<br>Fluidigm | 3161004B    |
| 24 | FoxP3 162Dy              | 162Dy | FOXP3              | 259D/C7   | human       | DVS-<br>Fluidigm | 3162024A    |
| 25 | CD45RA 163Dy             | 163Dy | CD45RA             | HI100     | human       | Biolegend        | 3162024A    |
| 26 | CD34 164Dy               | 164Dy | CD34               | 581       | human       | BD               | 555820      |
| 27 | CD45RO 165Ho             | 165Ho | CD45RO             | UCHL1     | human       | DVS-<br>Fluidigm | 3165011B    |
| 28 | CD44 166Er               | 166Er | CD44               | BJ18      | human       | DVS-<br>Fluidigm | 3166001B    |
| 29 | CD38 167Er               | 167Er | CD38               | HIT2      | human       | BioLegend        | 303502      |
| 30 | CD154 (CD40L)<br>168Er   | 168Er | CD154 (CD40L)      | 24-31     | human       | DVS-<br>Fluidigm | 3168006B    |
| 31 | CD161 169Tm              | 169Tm | CD161              | HP-3G10   | human       | BioLegend        | 339902      |
| 32 | CD3 170Er                | 170Er | CD3                | UCHT1     | human       | BioLegend        | 300443      |

|    |                     |       |                |         |       |              |             |
|----|---------------------|-------|----------------|---------|-------|--------------|-------------|
| 33 | CD68 171Yb          | 171Yb | CD68           | Y1/82A  | human | DVS-Fluidigm | 3171011B    |
| 34 | CD274 (PD-L1) 172Yb | 172Yb | CD274(PD-L1)   | 29E.2A3 | human | Biolegend    | 3171011B    |
| 35 | CD14 173Yb          | 173Yb | CD14           | HCD14   | human | Biolegend    | 329702      |
| 36 | HLA-DR 174Yb        | 174Yb | HLA-DR         | L243    | human | Biolegend    | 325602      |
| 37 | CXCR4 175Lu         | 175Lu | CXCR4          | 12G5    | human | DVS-Fluidigm | 3175001B    |
| 38 | Ki67 176Yb          | 176Yb | Ki67           | A019D5  | human | BioLegend    | 3175033B    |
| 39 | CD16 209Bi          | 209Bi | CD16           | 3G8     | human | DVS-Fluidigm | 3209002B    |
| 40 | Intercalator-Ir     | 191Ir | nucleus        |         |       | DVS-Fluidigm | SKU 201192B |
| 41 | Cisplatin-198Pt     | 198Pt | Cell viability |         |       | DVS-Fluidigm | SKU 201198  |

**Supplementary Table 8.** IMC antibody panel relevant to Figure 5.

| No | PRODUCT             | TAG   | TARGET           | CLONE                     | reactivity  | PRODUCT #   |
|----|---------------------|-------|------------------|---------------------------|-------------|-------------|
| 1  | CD57 141Pr          | 141Pr | CD57             | NK-1                      | human       | ab212405    |
| 2  | CD19 142Nd          | 142Nd | CD19             | 6OMP31                    | cross       | 3142014D    |
| 3  | Vimentin 143Nd      | 143Nd | Vimentin         | D21H3                     | cross       | 3143027D    |
| 4  | CD326/EpCAM 144Nd   | 144Nd | CD326<br>(EpCAM) | 9C4                       | human       | 3144026D    |
| 5  | CTLA-4 145Nd        | 145Nd | CTLA-4           |                           | human       | A2001       |
| 6  | NKG2D 146Nd         | 146Nd | NKG2D            | MM0489-10R27              | human       | ab89807     |
| 7  | CD163 147Sm         | 147Sm | CD163            | EDHu-1                    | human       | 3147021D    |
| 8  | Pan-Keratin 148Nd   | 148Nd | Pan-Keratin      | C11                       | human       | 3148020D    |
| 9  | CD11b 149Sm         | 149Sm | CD11b            | EPR1344                   | human/mouse | 3149028D    |
| 10 | IFN- $\gamma$ 150Nd | 150Nd | IFN- $\gamma$    | B27                       | human       | 10761-890   |
| 11 | CD31 151Eu          | 151Eu | CD31             | EPR3094                   | human       | 3151025D    |
| 12 | CD45 152Sm          | 152Sm | CD45             | CD45-2B11                 | human       | 3152016D    |
| 13 | CD44 153Eu          | 153Eu | CD44             | IM7                       | human/mouse | 3153029D    |
| 14 | CD11c 154Sm         | 154Sm | CD11c            | Polyclonal                | human       | 3154025D    |
| 15 | FoxP3 155Gd         | 155Gd | FoxP3            | 236A/E7                   | human       | 3155016D    |
| 16 | CD4 156Gd           | 156Gd | CD4              | EPR6855                   | human       | 3156033D    |
| 17 | E-Cadherin 158Gd    | 158Gd | E-Cadherin       | 24E10                     | cross       | 3158029D    |
| 18 | CD68 159Tb          | 159Tb | CD68             | KP1                       | human       | 3159035D    |
| 19 | Vista 160Gd         | 160Gd | Vista            | D1L2G                     | human       | 3160025D    |
| 20 | CD20 161Dy          | 161Dy | CD20             | H1                        | human       | 3161029D    |
| 21 | CD8a 162Dy          | 162Dy | CD8a             | C8/144B                   | human       | 3162034D    |
| 22 | PD-L1 163Dy         | 163Dy | PD-L1            |                           | human       | conjugated  |
| 23 | c-Myc p67 164Dy     | 164Dy | C-Myc p67        | 9E10                      | human       | 3164025D    |
| 24 | PD-1 165Ho          | 165Ho | PD-1             |                           | human       | conjugated  |
| 25 | CD45RA 166Er        | 166Er | CD45RA           | HI100                     | human       | 3166028D    |
| 26 | Granzyme B 167Er    | 167Er | Granzyme B       | EPR20129-217              | human       | 3167021D    |
| 27 | Ki-67 168Er         | 168Er | Ki-67            | B56                       | cross       | 3168022D    |
| 28 | MIC 169Er           | 169Er | MIC              | EPR22031                  | human       | ab241513    |
| 29 | CD3 170Er           | 170Er | CD3              | Polyclonal,<br>C-Terminal | human       | 3170019D    |
| 30 | CD27 171Yb          | 171Yb | CD27             | EPR8569                   | human       | 3171024D    |
| 31 | CD161 172Yb         | 172Yb | CD161            | OTI1D8                    | human       | ab273666    |
| 32 | CD45RO 173Yb        | 173Yb | CD45RO           | UCHL1                     | human       | 3173016D    |
| 33 | HLA-DR 174Yb        | 174Yb | HLA-DR           | YE2/36 HLK                | human       | 3174023D    |
| 34 | CD25 175Lu          | 175Lu | CD25             | EPR6452                   | human/mouse | ab213044    |
| 35 | Lysozyme 176Yb      | 176Yb | Lyz              | EPR2994(2)                | human/mouse | ab185129    |
| 36 | Intercalator-Ir     | 191Ir | nucleus          |                           |             | SKU 201192B |

**Supplementary Table 9.** CyTOF antibody panel for PBMC, BMDC, and tumor-infiltrating immune cells, relevant to Supplementary Figure 10.

| No | PRODUCT              | TAG   | TARGET             | CLONE    | reactivity         | Source       | PRODUCT #  |
|----|----------------------|-------|--------------------|----------|--------------------|--------------|------------|
| 1  | CD45 89Y             | 89Y   | CD45               | HI30     | human              | DVS-Fluidigm | 3089003B   |
| 2  | CD57 115In           | 115In | CD57               | HCD57    | human              | BioLegend    | 322325     |
| 3  | IdU 1127             | 127I  | S-phase            |          | DNA                | Sigma        | I7125-5G   |
| 4  | CXCR2 139La          | 139La | CD182, CXCR2       | 5E8      | Hu                 | BioLegend    | 70785      |
| 5  | CD49d 141Pr          | 141Pr | CD49d              | 9F10     | Hu                 | DVS-Fluidigm | 3141004B   |
| 6  | CD274 142Nd          | 142Nd | CD274, PD-L1       | MIH1     | Hu                 | eBioscience  | 14-5983-82 |
| 7  | TIM-3 143Nd          | 143Nd | TIM3, CD366        | BLR033F  | Hu                 | BETHYL       | A700-033CF |
| 8  | SYB-010 144Nd        | 144Nd | SYB-010            |          | Hu                 |              |            |
| 9  | CD4 145Nd (MDA)      | 145Nd | CD4                | RPA-T4   | Hu, Ch             | BioLegend    | 300502     |
| 10 | CD8a 146Nd           | 146Nd | CD8a               | RPA-T8   | Hu                 | DVS-Fluidigm | 3146001B   |
| 11 | CD20 147Sm           | 147Sm | CD20               | 2H7      | Hu                 | DVS-Fluidigm | 3147001B   |
| 12 | CD27 148Nd           | 148Nd | CD27               | LG.3A10  | Hu, Ms, Rt         | BioLegend    | 124202     |
| 13 | CD279 149Sm          | 149Sm | CD279, PD-1        | EH12.2H7 | Hu, Ch, Rh         | BioLegend    | 329902     |
| 14 | CLA 150Nd            | 150Nd | CD162, CLA, PSGL-1 | HECA-452 | Hu, Ms             | BD           | 555946     |
| 15 | CD14 151Eu           | 151Eu | CD14               | M5E2     | Hu                 | BioLegend    | 301802     |
| 16 | TCRgd 152Sm          | 152Sm | TCRgd              | 11F2     | Hu                 | DVS-Fluidigm | 3152008B   |
| 17 | CD45RA 153Eu         | 153Eu | CD45RA             | HI100    | Hu                 | DVS-Fluidigm | 3153001B   |
| 18 | Cytokeratin 154Sm    | 154Sm | Cytokeratin(pan)   | C-11     | All                | BioLegend    | 628602     |
| 19 | CD278 155Gd          | 155Gd | CD278, ICOS        | C398.4A  | Hu, Ms, Rt, Rh, Sw | BioLegend    | 313502     |
| 20 | CD195 (CCR5) 156Gd   | 156Gd | CD195, CCR5        | NP6-G4   | Hu                 | DVS-Fluidigm | 3156015A   |
| 21 | CD25 158Gd           | 158Gd | CD25               | BC96     | Hu                 | BioLegend    | 302602     |
| 22 | CCR7(CD197) 159Tb    | 159Tb | CD197, CCR7        | G043H7   | Hu, Rh             | DVS-Fluidigm | 3159003A   |
| 23 | VISTA 160Gd (Bethyl) | 160Gd | VISTA, B7-H5       | BLR035F  | Hu                 | BETHYL       | A700-035CF |
| 24 | CD152 (CTLA-4) 161Dy | 161Dy | CD152              | 14D3     | Hu                 | DVS-Fluidigm | 3161004B   |
| 25 | FoxP3 162Dy          | 162Dy | FoxP3              | 259D/C7  | Hu, Mk, Rh         | DVS-Fluidigm | 3162024A   |
| 26 | CD19 163Dy           | 163Dy | CD19               | HIB19    | Hu, Ch             | BioLegend    | 302202     |
| 27 | CXCR5 164Dy          | 164Dy | CXCR5, CD185       | 51505    | Hu                 | DVS-Fluidigm | 3164016B   |
| 28 | CD45RO 165Ho         | 165Ho | CD45RO             | UCHL1    | Hu, Cy, Rh, Ch     | DVS-Fluidigm | 3165011B   |
| 29 | CD314 166Er          | 166Er | CD314, NKG2D       | ON72     | Hu                 | BC           | A08934     |
| 30 | CXCR7 167Er          | 167Er | CXCR7              | 8F11-M16 | Hu, Ms             | BioLegend    | 331102     |
| 31 | CD154 (CD40L) 168Er  | 168Er | CD154, CD40L       | 24-31    | Hu                 | DVS-Fluidigm | 3168006B   |
| 32 | CD161 169Tm          | 169Tm | CD161              | HP-3G10  | Hu                 | BioLegend    | 339902     |
| 33 | CD3 170Er (MDA)      | 170Er | CD3                | UCHT1    | Hu                 | BioLegend    | 300443     |

|    |                           |       |                |          |            |              |             |
|----|---------------------------|-------|----------------|----------|------------|--------------|-------------|
| 34 | CD68 171Yb                | 171Yb | CD68           | Y1/82A   | Hu         | DVS-Fluidigm | 3171011B    |
| 35 | CD314 172Yb               | 172Yb | CD314, NKG2D   | 1D11     | Hu         | BioLegend    | 320802      |
| 36 | EOMES 173Yb               | 173Yb | EOMES          | 644730   | Hu         | R&D          | MAB6166     |
| 37 | MIC A/B 174Yb             | 174Yb | MIC A/B, MHC-I | 6D4      | Hu         | DVS-Fluidigm | 3174016B    |
| 38 | CXCR4 175Lu               | 175Lu | CD184, CXCR4   | 12G5     | Hu, Rh     | DVS-Fluidigm | 3175001B    |
| 39 | CD56 176Yb (DVS-NCAM16.2) | 176Yb | CD56           | NCAM16.2 | Hu, Cy, Rh | DVS-Fluidigm | 3176008B    |
| 40 | CD16 209Bi                | 209Bi | CD16           | 3G8      | Hu, Rh     | DVS-Fluidigm | 3209002B    |
| 41 | Intercalator-Ir           | 191Ir | nucleus        |          |            | DVS-Fluidigm | SKU 201192B |
| 42 | Cisplatin-198Pt           | 198Pt | Cell viability |          |            | DVS-Fluidigm | SKU 201198  |



**Supplementary Figure 1.** Consolidated Standards of Reporting Trials (CONSORT) flow diagram.

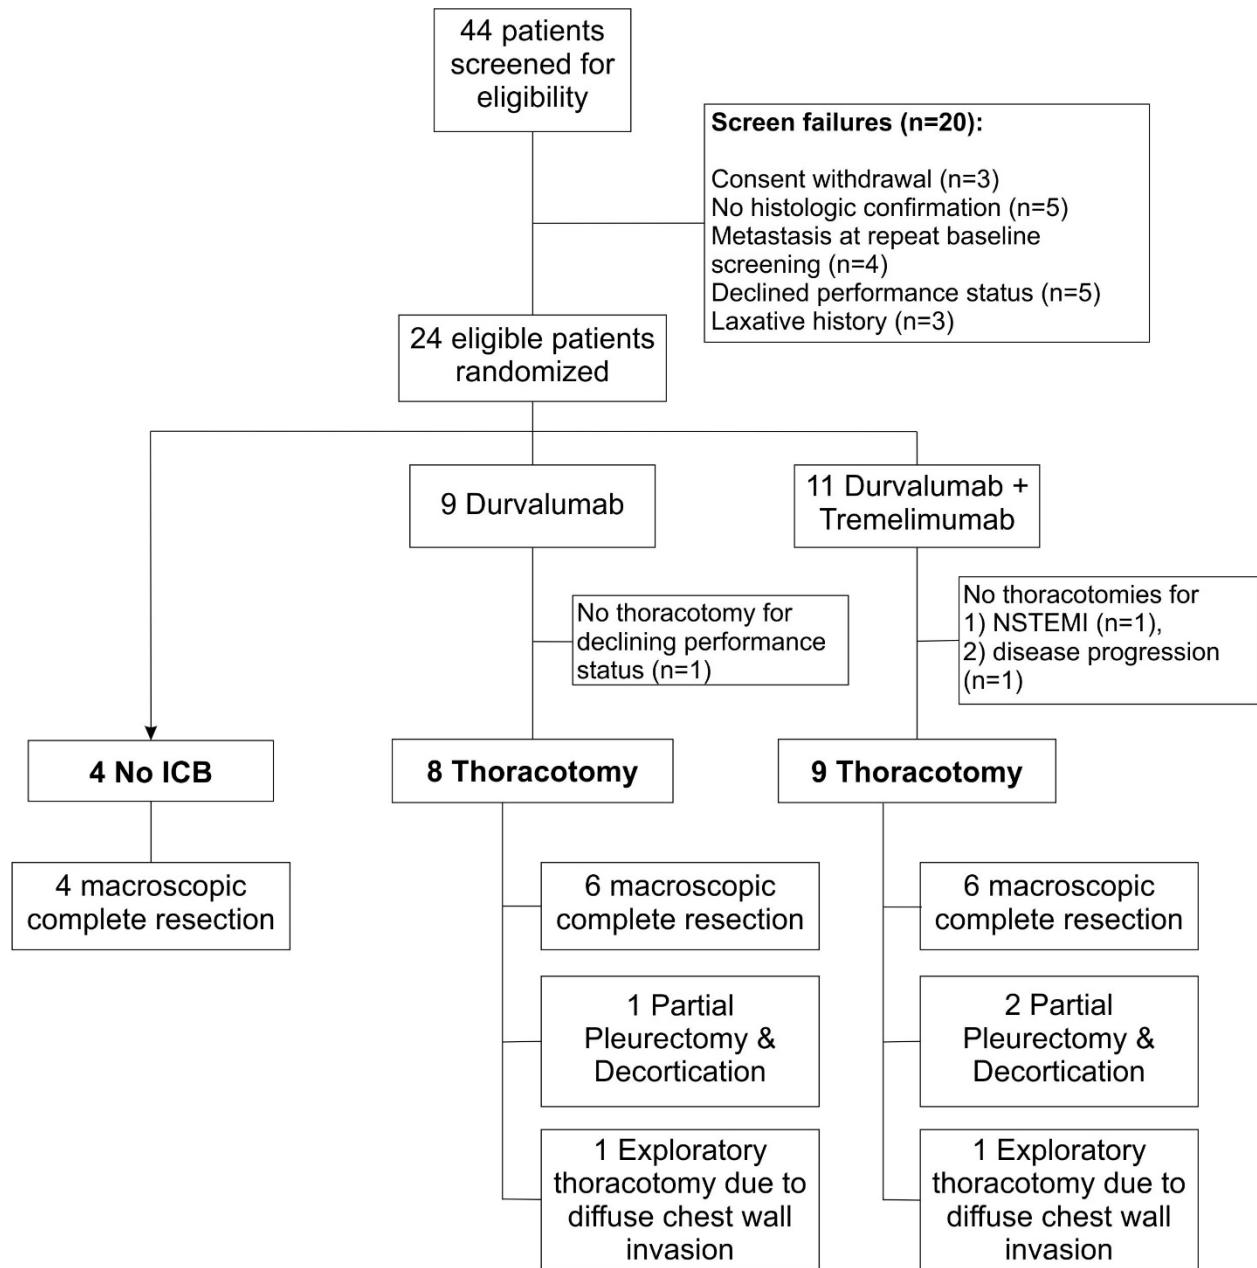

Flow diagram of patient disposition throughout the phases of the study including screening, randomization, neoadjuvant therapy, and surgery.

NSTEMI, non-ST-elevation myocardial infarction.

**Supplementary Figure 2.** Analysis scheme for imaging mass cytometry (IMC).

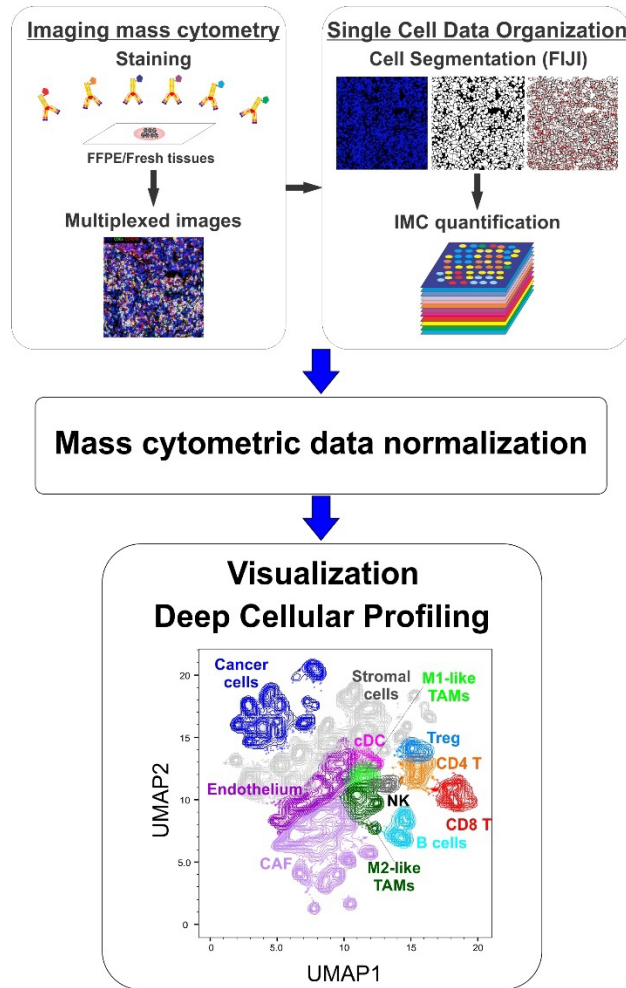

To quantify the .mcd imaging files yielded from imaging mass cytometry (IMC) and to determine the overall spatial architecture of the tumor immune microenvironment, we used the Fiji platform for cell segmentation and conversion of imaging data into flow cytometric data. 32-bit TIFF stacked images were loaded in Fiji and automated cell segmentation was performed by estimating cell boundaries by expanding the perimeter of their nuclei, identified by Cell ID Intercalator-iridium (191Ir). Once images from the IMC methodology are acquired, they were quantified through FIJI's threshold and watershed tools. Protein expression data were then extracted at the single-cell level through mean intensity multiparametric measurements performed on individual

cells, and acquired single-cell data were transferred into additional cytometric analysis in FlowJo® V10 software. All protein markers in quantified IMC data are adjusted with 191Ir and 193Ir nucleus intensities and normalized with CytoNorm across IMC regions of interest (ROIs). CytoNorm is a normalization method for cytometry data applicable to large clinical studies, via a plug-in for FlowJo.

**Supplementary Figure 3.** Expression of pan-cytokeratin in sarcomatoid malignant pleural mesothelioma.

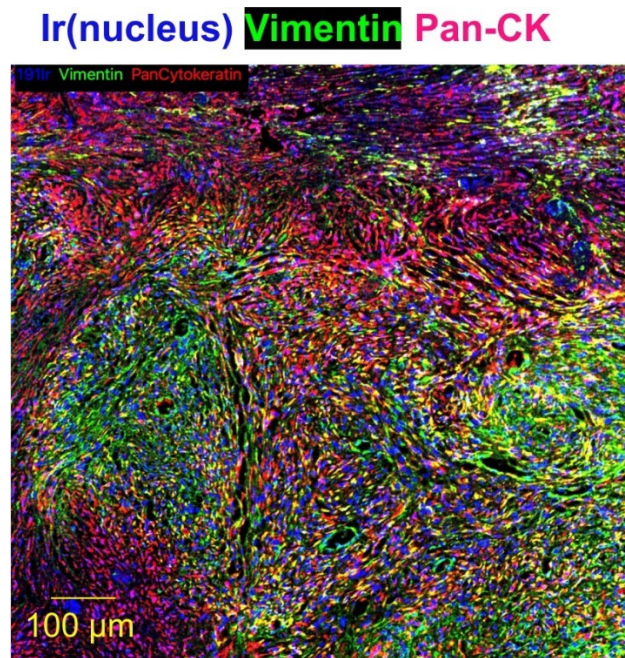

Pan-cytokeratin has proven to be useful in the diagnosis of mesothelioma because virtually all epithelioid MPM and most sarcomatoid MPM produce positive results. In these tumors, aside from immune cells (CD45+PanCK-) and cancer cells regardless of histology (CD45-PanCK+), we demonstrated that cancer-associated fibroblasts (CAF; CD45-PanCK-Vimentin+ cells) and vascular endothelial cells (CD45-PanCK-CD31+ cells) were the main stromal cell types (CD45-PanCK-).

**Supplementary Figure 4.** Frequencies of other immune and stromal cell compositions before and after ICB.

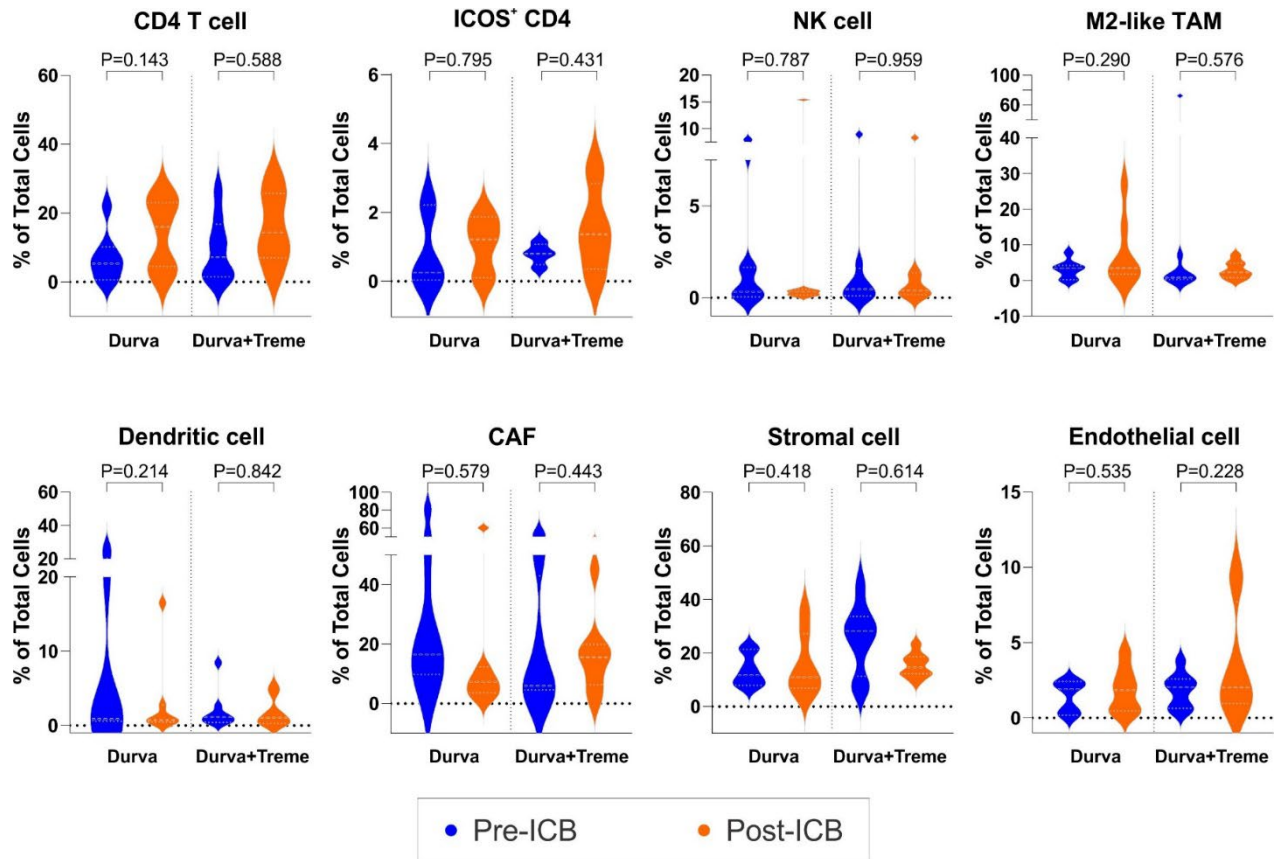

P-values were calculated by paired-t-tests. On each violin plot, the central mark indicates the median, and the bottom and top edges of the plot indicate the 25th and 75th percentiles, respectively.

CAF, cancer-associated fibroblast; ICOS, inducible T cell costimulator; NK, Natural Killer; TAM, tumor-associated macrophage.

Supplementary Figure 5. Overall survival of historical MPM cohorts.

### A Historical MPM cohort (n=500)

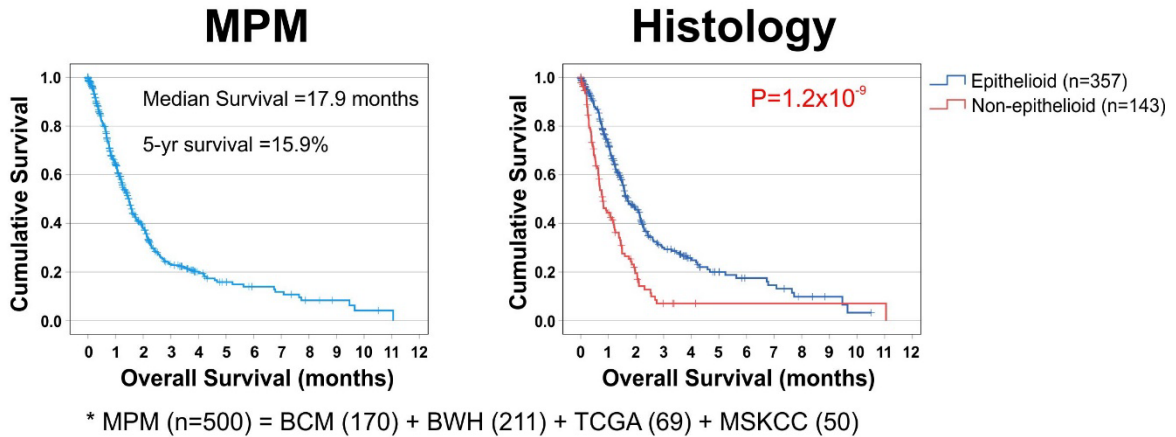

### B Neoadjuvant trial (n=20)

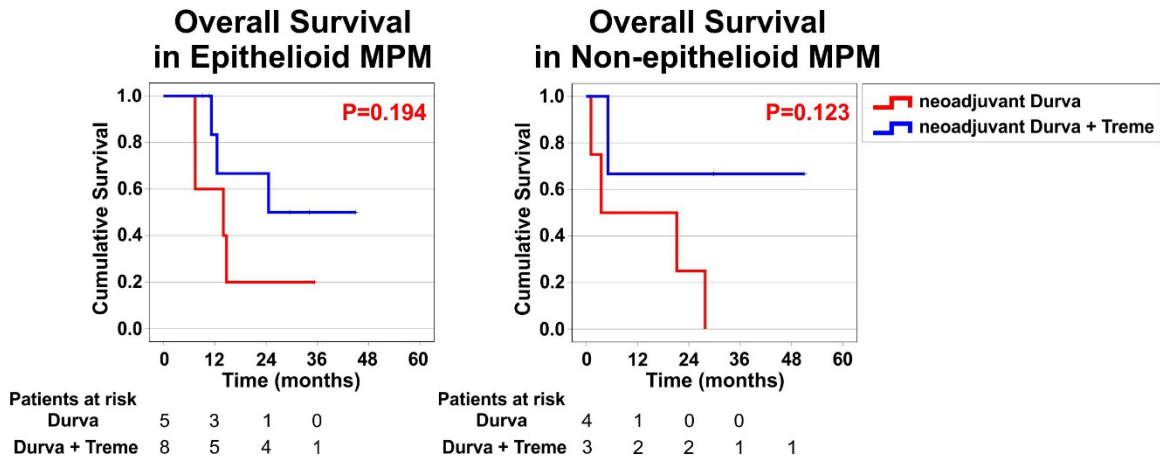

A. Overall survival of historical MPM cohorts. To compare survival data of this study with historical cohorts, we utilized the survival data of 500 MPM patients obtained from the Baylor College of Medicine (BCM) historical cohort (n=170), the Brigham and Women's Hospital (BWH) cohort (n=211), the Cancer Genome Atlas (TCGA) cohort (n=69), and the Memorial Sloan-Kettering Cancer Center (MSKCC) cohort (n=50). B. Comparison of overall survival according to the histology in this neoadjuvant clinical trial.

**Supplementary Figure 6.** Germinal center containing Ki67(+) B cells and CD68(+) fDC-like cell meshwork in mature tertiary lymphoid structure.

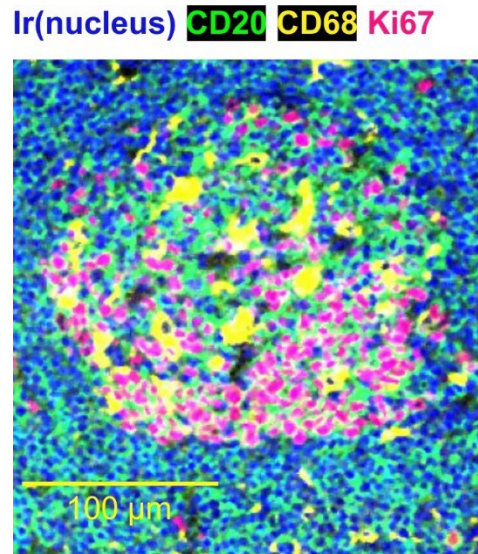

The majority of tertiary lymphoid structures (TLSs) in this study were immature or partially formed TLSs that did not contain a germinal center and a representative TLS shown in **Figure 3A**. As the number of IMC antibodies was limited to 35 to characterize major cell phenotypes, our IMC panel did not include CD21, CD35, or CXCL13 to identify follicular dendritic cells (fDC) in TLSs. Our IMC panel did contain myeloid markers such as CD11b, CD11c, CD68, CD163, and HLA-DR. Herein, we demonstrate presence of a CD68(+) fDC-like cell meshwork in the germinal center of mature TLSs.



**Supplementary Figure 7.** Characterization of CD57<sup>+</sup> T cell populations in tumor and PBMCs from MPM patients.

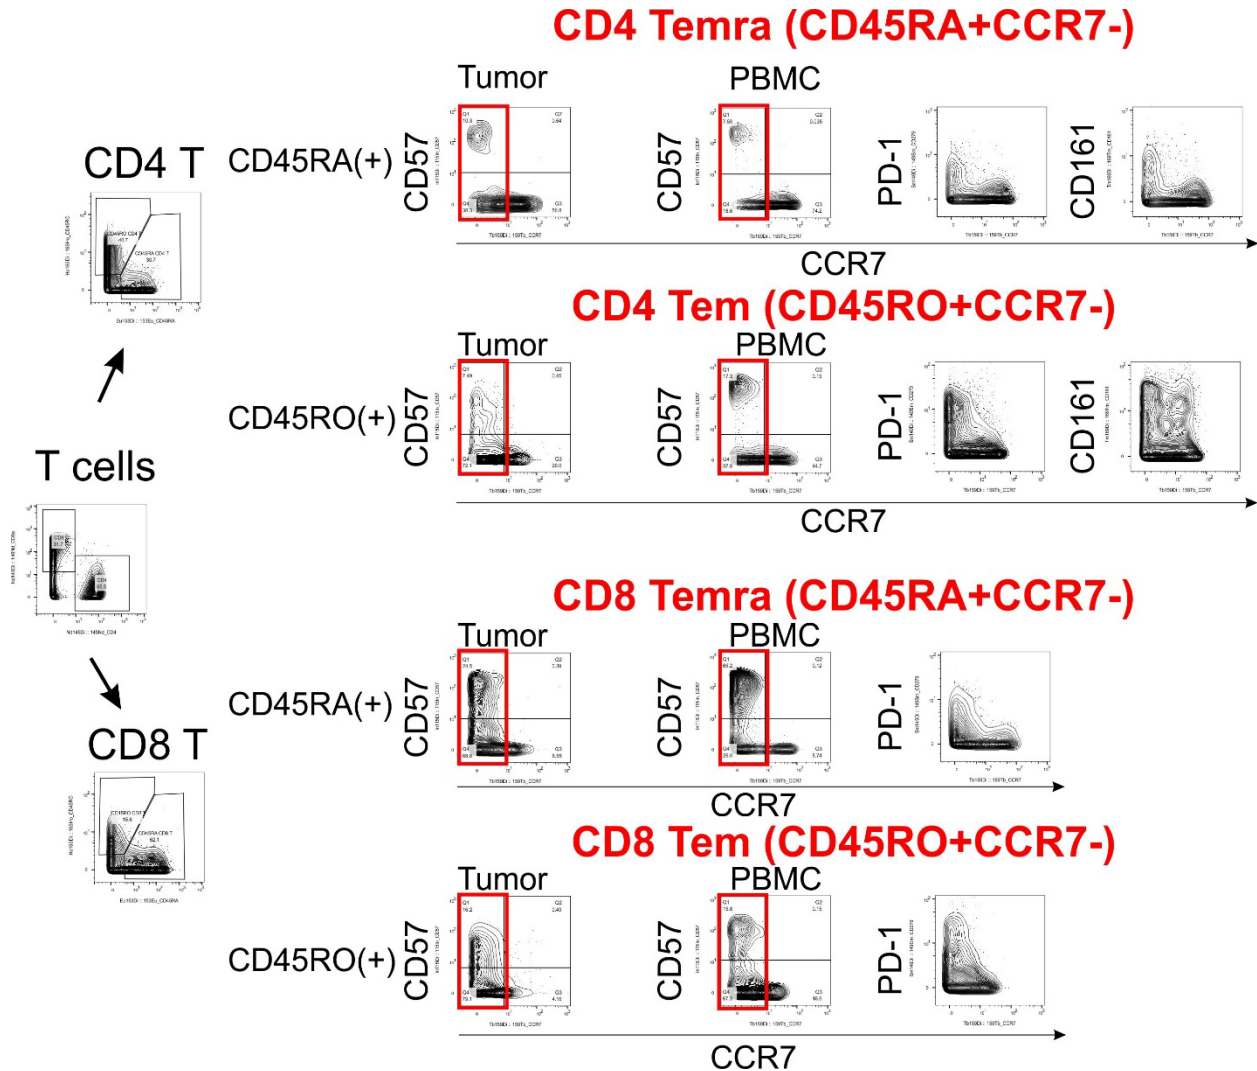

CytoF analyses demonstrated that CD57<sup>+</sup> T cells were enriched for CD8 and CD4 effector memory T cells (Tem; CD45<sup>+</sup>CD3<sup>+</sup>CD45RO<sup>+</sup>CD45RA<sup>-</sup>CCR7<sup>-</sup>) and CD8 and CD4 effector memory T cells that re-express CD45RA (Temra; CD45<sup>+</sup>CD3<sup>+</sup>CD45RA<sup>+</sup>CD45RO<sup>-</sup>CCR7<sup>-</sup>CD27<sup>-</sup>CD28<sup>-</sup>). These CD57<sup>+</sup> T cells had high expression of PD-1.



**Supplementary Figure 8.** Phenotyping of circulating CD8 and CD4 T cells in MPM patients that received neoadjuvant ICB.

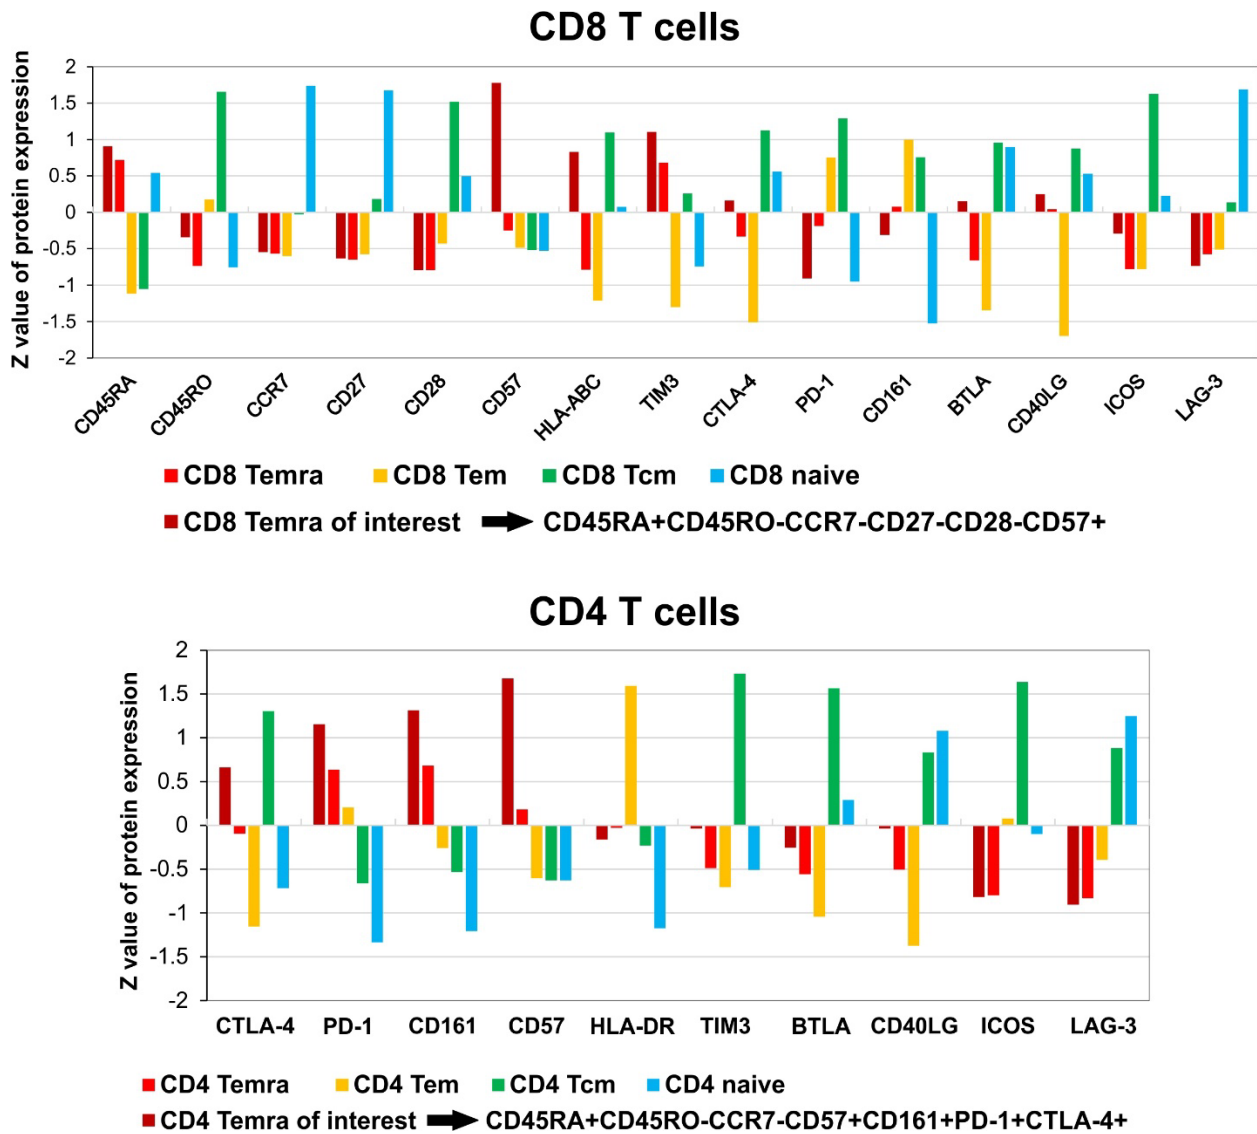

CytoTOF revealed that CD57<sup>+</sup>CD8 Temra was a unique Temra population that overexpressed the immunoregulatory marker TIM-3, and that CD57<sup>+</sup>CD4 Temra uniquely overexpressed CD161, PD-1, and CTLA-4. CD8 and CD4 "Temra of interest" are the CD57<sup>+</sup> Temra populations that increased after neoadjuvant durvalumab plus tremelimumab.

**Supplementary Figure 9.** Alteration of naïve T (Tnaive) and stem cell-like memory T (Tscm) cells in PBMCs and BMMCs.

## A PBMC

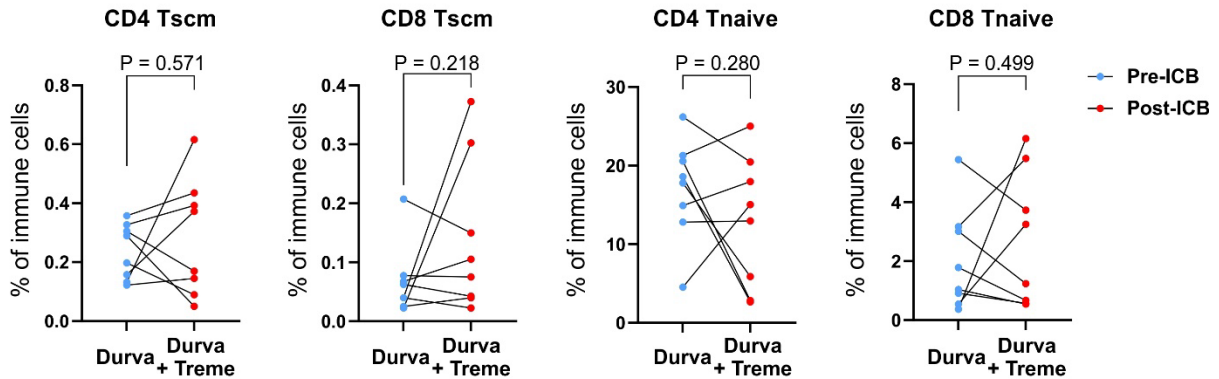

## B BMMC

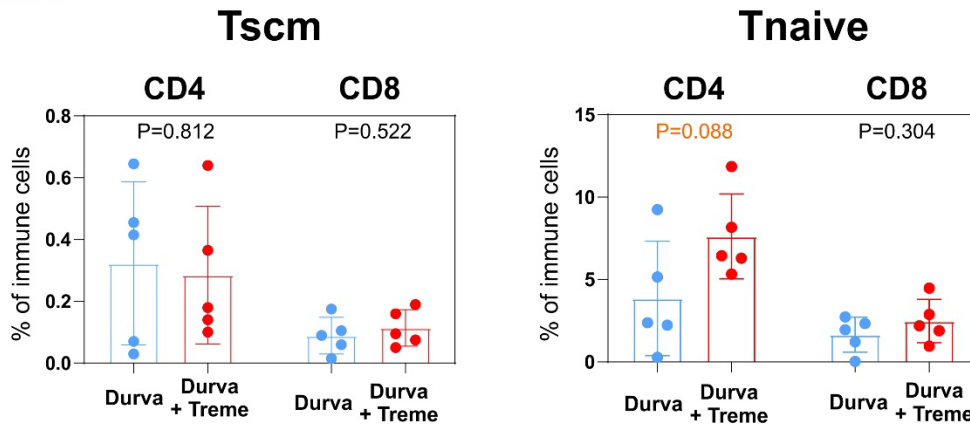

Stem cell-like memory T (Tscm) cells exhibit analogous effector function to memory T cells, but they also have increased proliferation, self-renewal, and strong anti-tumor function compared with conventional memory T cells. Tscm cells share common phenotypic characteristics with naïve T cells as they are CD45<sup>+</sup>CD3<sup>+</sup>CD45RA<sup>+</sup>CD45RO<sup>-</sup>CCR7<sup>+</sup> and CD27<sup>+</sup>; however, they can be distinguished from naïve T cells by a high expression of CD95, CD122 (IL-2R $\beta$ ), and Ki67. We therefore have defined Ki67<sup>+</sup> naïve T cells as Tscm. **A.** Tscm and Tnaive cells in PBMCs were not changed during ICB treatment. **B.** Tscm cells in BMMCs were not significantly different between monotherapy and dual therapy. However, CD4 naïve T cells had an increased tendency

after dual ICB treatment, implying that dual ICB may induce T cell differentiation in bone marrow as well as their migration to the tumor-immune microenvironment.

Supplementary Figure 10. Presence of follicular helper T cells in CD57(+) T cells.

### CD57(+) immune cells

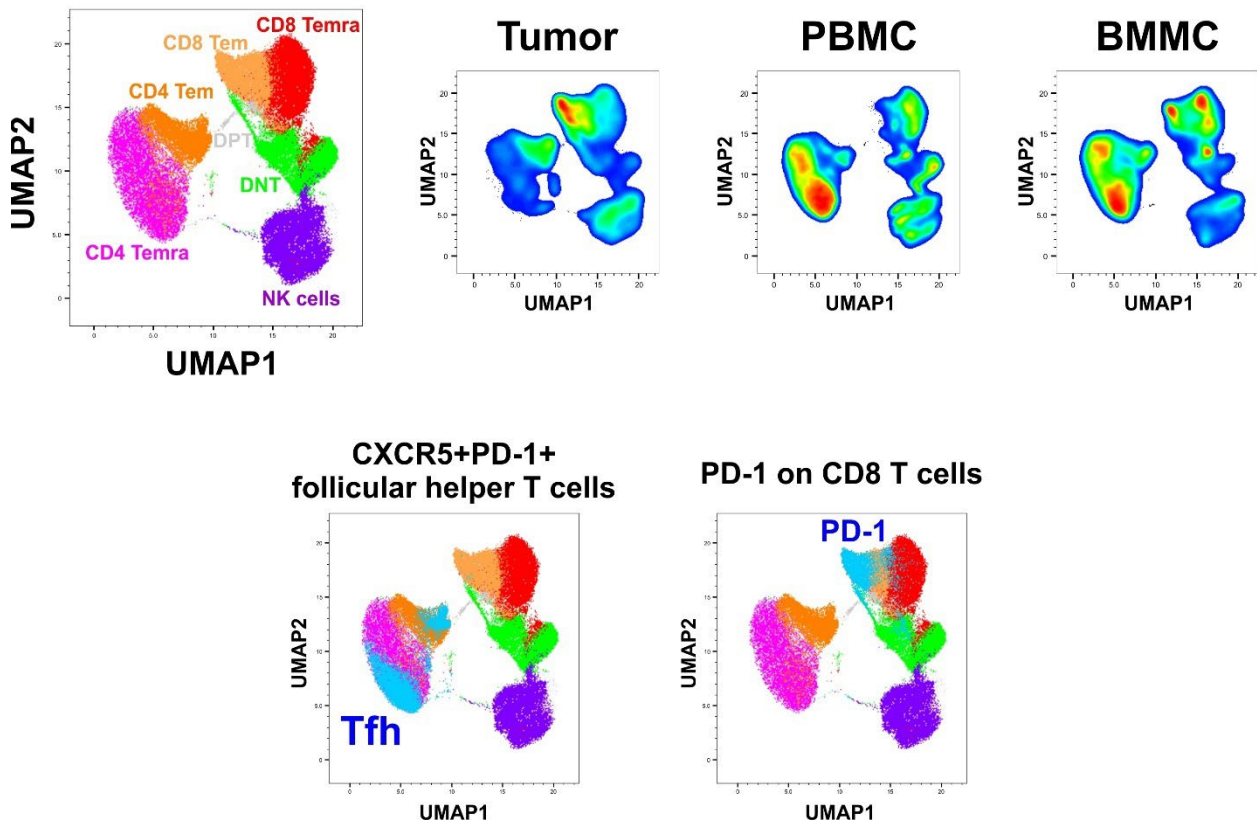

We have characterized CD57(+) immune cells with a CyTOF panel including CXCR5 and PD-1 to confirm the presence of follicular helper T cells in CD57(+) immune cells in the pre-ICB tumor ecosystem, pre-ICB peripheral blood mononuclear cells (PBMCs), post-ICB bone marrow mononuclear cells (BMMCs) because CD57 is not a phenotypic marker for Tfh. CD57(+) cells are mainly composed of 50% CD4 T cells, 21% CD8 T cells, 15% NK cells, and 10% double negative CD4(-)CD8(-)CD3(+) T cells. CD57(+) CD4 T cells consist of 87% CD4 Temra and 10% CD4 Tem, and CD57(+) CD8 T cells consist of 75% CD8 Temra and 21% CD8 Tem. CXCR5(+)PD-1(+) Tfh are 11% in CD4 Temra and 19% of CD4 Tem. CD57(+) CD4 Temra and CD8 Temra were found in pre-ICB tumors, pre-ICB PBMCs, and post-ICB BMMCs. However, CD57(+) CD8 Tem expressing PD-1 was dominant in tumors and post-ICB BMMCs, not in pre-ICB PBMCs.

**Supplementary Figure 11.** Schematic illustration of the *de novo* anti-tumor immune response to ICB that occurs in the peripheral immune system.

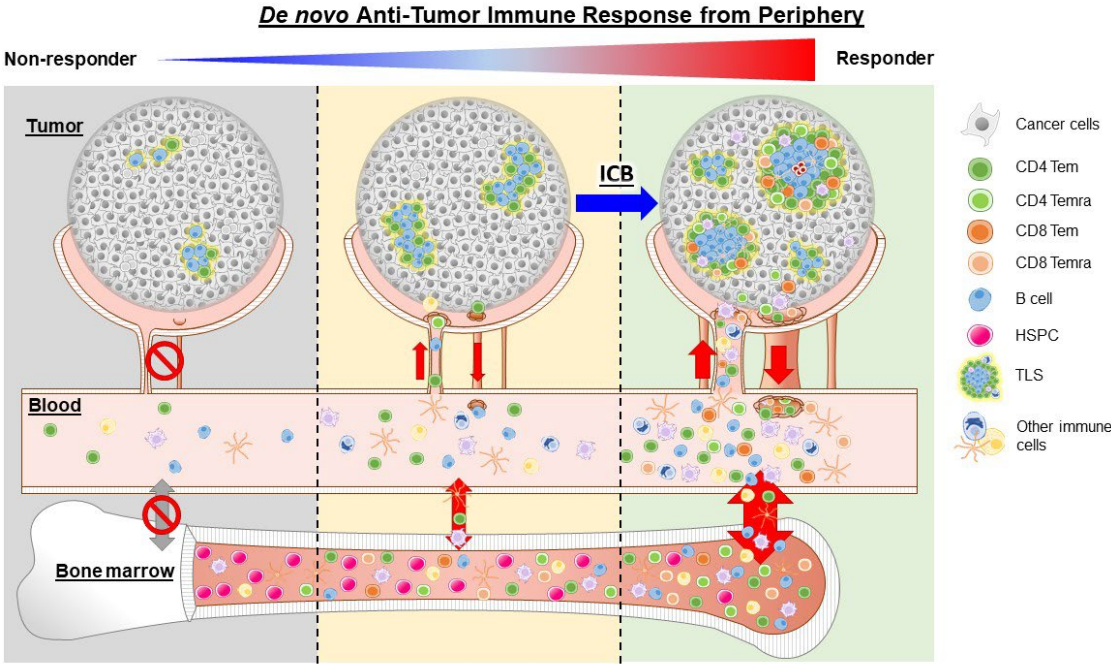

Our data support a paradigm in which effective immune checkpoint blockade generates *de novo* systemic immune responses that originate in the bone marrow and extend to the tumor microenvironment.

## SUPPLEMENTARY METHODS

**Trial Oversight.** The protocol and all modifications were approved by the Institutional Review Board at BCM (H-36952) and all patients provided written informed consent before enrollment. The study was designed and the manuscript was written by authors who vouch for accuracy of its data and adherence to its protocol.

### **Inclusion Criteria** included:

- Written informed consent obtained from the subject prior to performing any protocol-related procedures, including screening evaluations.
- Age greater than 18 years at time of study entry.
- Any MPM histology (epithelial, biphasic, sarcomatoid).
- N0 or N1 nodal disease as present on preoperative chest CT and/or PET-CT.
- Radiographic N2 nodal disease if no progression after 2 cycles of standard chemotherapy.
- Eastern Cooperative Oncology Group (ECOG) performance status of 0 or 1.
- Adequate normal organ and marrow function as defined below: Hemoglobin greater or equal to 9.0 g/dL; Absolute neutrophil count (ANC) greater or equal to  $1.5 \times 10^9/L$  (greater than 1500 per  $mm^3$ ); Platelet count greater or equal to  $100 \times 10^9/L$  (greater than 100,000 per  $mm^3$ ); Serum bilirubin less than or equal to 1.5 x institutional upper limit of normal (ULN); AST (SGOT)/ALT (SGPT) less than or equal to 2.5 x institutional upper limit of normal unless liver metastasis are present, in which case it must be less than or equal to 5 x ULN; Serum creatinine clearance greater than 50 mL/min by the Cockcroft-Gault formula or by 24-hour urine collection for determination of creatinine clearance.

- Female subjects must either be of non-reproductive potential (i.e., post-menopausal by history: greater than or equal to 60 years old and no menses for greater or equal to 1 year without an alternative medical cause; OR history of hysterectomy, OR history of bilateral tubal ligation, OR history of bilateral oophorectomy) or must have a negative serum pregnancy test upon study entry.
- Surgically resectable MPM with no disease extension beyond the ipsilateral hemithorax.
- Planned resectional surgery for MPM by pleurectomy and decortication (P/D) or extrapleural pneumonectomy (EPP).

**Exclusion Criteria** included:

- Involvement in the planning and/or conduct of the study (applies to both AstraZeneca staff and/or staff at the study site) or previous enrollment or randomization in the present study.
- Participation in another clinical study with an investigational product during the last 3 months.
- Any previous treatment with a PD-1 or PD-L1 inhibitor, including durvalumab.
- Receipt of the last dose of anti-cancer therapy (chemotherapy, immunotherapy, endocrine therapy, targeted therapy, biologic therapy, tumor embolization, monoclonal antibodies, other investigational agent) 30 days prior to the first dose of study drug, and 30 days prior to the first dose of study drug for subjects who have received prior TKIs [e.g., erlotinib, gefitinib and crizotinib] and within 6 weeks for nitrosourea or mitomycin C).
- Current or prior use of immunosuppressive medication within 28 days before the infusion with durvalumab or durvalumab + tremelimumab and through 90 days post infusion, with the exceptions of intranasal and inhaled corticosteroids or systemic corticosteroids at

physiological doses, which are not to exceed 10 mg/day of prednisone, or an equivalent corticosteroid.

- Any unresolved toxicity (greater than CTCAE grade 2) from previous anti-cancer therapy.
- Any prior Grade greater than or equal to 3 immune-related adverse event (irAE) while receiving any previous immunotherapy agent, or any unresolved irAE greater than Grade 1.
- Active or prior documented autoimmune disease within the past 2 years. Subjects with vitiligo, Grave's disease, or psoriasis not requiring systemic treatment (within the past 2 years) are not excluded.
- Intraabdominal malignancy discovered at laparoscopy and proven pathologically, or nodal disease discovered at mediastinoscopy (N2 or N3 disease) and proven pathologically.
- N3 nodal disease.
- No tissue obtainable at the time of thoracoscopy.
- Active or prior documented inflammatory bowel disease (e.g., Crohn's disease, ulcerative colitis).
- History of primary immunodeficiency.
- History of allogeneic organ transplant.
- History of hypersensitivity to durvalumab.
- History of hypersensitivity to tremelimumab or the combination of durvalumab + tremelimumab.
- Uncontrolled intercurrent illness including, but not limited to, ongoing or active infection, symptomatic congestive heart failure, uncontrolled hypertension, unstable angina pectoris, cardiac arrhythmia, active peptic ulcer disease or gastritis, active bleeding diatheses



including any subject known to have evidence of acute or chronic hepatitis B, hepatitis C or human immunodeficiency virus (HIV).

- Psychiatric illness/social situations that would limit compliance with study requirements or compromise the ability of the subject to give written informed consent.
- Known history of previous clinical diagnosis of tuberculosis.
- History of leptomeningeal carcinomatosis.
- Receipt of live attenuated vaccination within 30 days prior to study entry or within 6 months of receiving durvalumab or durvalumab + tremelimumab.
- Receipt of drugs with laxative properties and herbal or natural remedies for constipation within 90 days of receiving durvalumab or durvalumab + tremelimumab.
- Receipt of sunitinib within 3 months of receiving tremelimumab.
- Female subjects who are pregnant, breastfeeding, or male or female subjects of reproductive potential who are not employing an effective method of birth control.
- Any condition that, in the opinion of the investigator, would interfere with the evaluation of the study treatment or interpretation of subject safety or study results.
- Symptomatic or uncontrolled brain metastases requiring concurrent treatment, inclusive of but not limited to surgery, radiation, and/or corticosteroids.
- Subjects with uncontrolled seizures.
- History of interstitial lung disease/pneumonitis.

**Historical MPM groups.** To compare survival data of this study with historical cohorts, we utilized the survival data of 500 MPM patients obtained from the Baylor College of Medicine (BCM) historical cohort (n=170),<sup>1,2</sup> the Brigham and Women's Hospital (BWH) cohort (n=211),<sup>3</sup>

the Cancer Genome Atlas (TCGA) cohort (n=69),<sup>4</sup> and the Memorial Sloan Kettering Cancer Center (MSKCC) cohort (n=50).<sup>5</sup>

**Adverse Event Monitoring.** Adverse events were monitored for at least 30 days after randomization according to the Common Terminology Criteria for Adverse Events, version 4.03, of the National Institutes of Health.<sup>6</sup>

**Evaluation of pathologic response in MPM.** Hematoxylin and eosin (H&E)-stained slides of the primary lung tumor and lymph node resection specimens were evaluated and staged according to the AJCC-TNM system, 8th edition.<sup>7, 8</sup> A minimum requirement of 5 sections of the tumor was needed for proper examination of the therapy response, and 3 regions of tumor were examined per case. The histologic parameters used for evaluation of therapy response included those that are used in general for most solid organ tumors including histologic subtype of the tumor, percentage of viable tumor, percentage of necrosis, percentage of fibrosis, dystrophic calcifications, and lymphohistiocytic response surrounding the tumor. Tumor samples from both before and after neoadjuvant ICB were evaluated using these criteria. The tumor bed is defined by residual viable tumor (RVT) + necrosis + regression bed. The total percent surface area(s) of each of these three components is estimated across all slides to calculate immune-related %RVT (%irRVT).

*%irRVT = residual viable tumor (RVT) area/total tumor bed area x 100, whereby the total tumor bed = RVT + necrosis + regression bed.*

The percentage of tumor regression after ICB was calculated as 100 minus %irRVT. If multiple tumor foci are present, the areas from each are summed such that the %irRVT is a representation of the total primary tumor burden. For the current study, the quantitative immune-

related pathologic response criteria (irPRC)<sup>9</sup> are established as follows: up to 10% residual cancer cells remaining (major pathologic response), > 10% and < 80% residual cancer cells remaining (partial pathologic response), and  $\geq$  80% residual cancer cells remaining (no pathologic response). This quantification is adopted from non-small cell lung cancer,<sup>8</sup> as there are no published criteria to our knowledge to quantify pathologic complete response in mesothelioma from the previous studies.

**PD-L1 Expression & TLS Density.** Pre-treatment tumor PD-L1 expression was measured by the FDA-approved PD-L1 clone 28-8 or 22C3 (PharmDx) in FFPE sections and quantified as percentage of tumor cells with membranous PD-L1 staining. The density of tertiary lymphoid structures (TLSs) was calculated as number of TLSs/total area in regions of interest (mm<sup>2</sup>).

**Assessment of Immunologic Response.** Imaging mass cytometry (IMC) was performed on formaldehyde-fixed paraffin-embedded (FFPE) tumor sections using 35 markers (**Supplementary Tables 5 and 8**). Following cell segmentation, data were processed into a single-cell format and plotted by uniform manifold approximation and projection (UMAP) or T-distributed Stochastic Neighbor Embedding (t-SNE)<sup>10, 11</sup> for dimensionality reduction (**Supplementary Figure 2**). Time-of-flight mass cytometry (CyTOF) was performed on peripheral blood mononuclear cells (PBMCs), bone marrow mononuclear cells (BMMCs), and tumor single cells using 42 markers (**Supplementary Tables 6, 7, and 9**) and UMAP was applied to visualize temporal cell trajectories.<sup>12</sup>

**Single-cell preparations.**

MPM tumors. All human samples were delivered from the operating room to the research laboratory immediately after the specimens were resected. The samples were kept in RPMI without glutamate media in ice during transport. Cancer specimens were processed into single-cell suspensions, fresh frozen tissue preparations, samples cryopreserved in optimal cutting temperature (OCT) compound, and formaldehyde-fixed paraffin-embedded tissues (FFPE). MPM tumors were finely minced and digested in unsupplemented RPMI 1640 (without glutamate) using a human Tumor Dissociation Kit (Miltenyi Biotec Inc., Auburn, CA, USA, Cat.No.130-095-929) in 50 mL Falcon tubes for 30 minutes in the 37°C rotating incubator. Cells were then filtered through a 70 µm cell strainer (Corning Life Sciences Plastic, Cat.No.07201431), washed, and lysed in ACK lysing buffer (Life Technologies, Cat.No.A049201). After centrifuging cells with unsupplemented RPMI media for 5 min at 400g in 20°C and washing two times, supernatants were carefully suctioned off. The cell pellet underwent a final washing with 40 mL supplemented cell culture media (RPMI with FBS), and cells were refiltered through a 70 µm cell strainer. After centrifuging the cells for 5 min at 400g at 20°C, the supernatant was carefully suctioned off. Cells were placed in freezing media (90% FBS with 10% DMSO) and cryopreserved in -80°C freezer storage after cell counting with a cell counter (Countess II FL, Life Technologies, Cat.No.AMQAF1000). For long-term preservation, the cryovials were transferred into a liquid nitrogen tank.

Peripheral blood mononuclear cells (PBMCs) Whole blood was kept in anticoagulant-treated whole blood tubes on ice or at 4°C refrigerators. 15 ml Ficoll-Paque solution was placed into a new 50ml falcon tube. The whole blood was diluted with 15ml DPBS/EDTA (1:1 ratio) and mixed with a pipet. 30 ml of the diluted blood was gently layered on the top of the Ficoll-Paque solution. It was centrifuged for 20 min at 800g, 18°-20°C, without a brake. Plasma samples in the upper

phase were collected, and interphases were collected into a new 50ml falcon tube. After centrifuging cells with DPBS/EDTA solution for 5 min at 300g in 20°C and washing two times, supernatants were carefully suctioned off. Cells were lysed in ACK lysing buffer (Life Technologies, Cat.No.A049201). After centrifuging cells with DPBS for 5 min at 300g in 20°C and washing two times, supernatants were carefully suctioned off. The cell pellet underwent a final washing with 40 mL supplemented cell culture media (RPMI with FBS). After centrifuging the cells for 5 min at 300g at 20°C, the supernatant was carefully suctioned off. Cells were placed in freezing media (90% FBS with 10% DMSO) and cryopreserved in -80°C freezer storage after cell counting with a cell counter (Countess II FL, Life Technologies, Cat.No.AMQAF1000). For long-term preservation, the cryovials were transferred into a liquid nitrogen tank.

*Bone marrow mononuclear cells (BMMCs)* Resected rib was longitudinally split, and bone marrow was mechanically scraped off. Cells were then filtered through a 70 µm cell strainer (Corning Life Sciences Plastic, Cat.No.07201431), washed, and lysed in ACK lysing buffer (Life Technologies, Cat.No.A049201). After centrifuging cells with unsupplemented RPMI media for 5 min at 400g in 20°C and washing two times, supernatants were carefully suctioned off. The cell pellet underwent a final washing with 40 mL supplemented cell culture media (RPMI with FBS), and cells were refiltered through a 70 µm cell strainer. After centrifuging the cells for 5 min at 400g at 20°C, the supernatant was carefully suctioned off. Cells were placed in freezing media (90% FBS with 10% DMSO) and cryopreserved in -80°C freezer storage after cell counting with a cell counter (Countess II FL, Life Technologies, Cat.No.AMQAF1000). For long-term preservation, the cryovials were transferred into a liquid nitrogen tank.

**Imaging mass cytometry (IMC).** FFPE tissue samples were sectioned at a 5- $\mu\text{m}$  thickness for IMC. FFPE tissues on charged slides were stained with 1:100 diluted antibody cocktails (concentration of each antibody=0.5mg/mL) as recommended by the user's manual.<sup>13</sup> The slides were scanned in the Hyperion Imaging System (Fluidigm). They were scanned at least four regions of interest in  $>1\text{mm}^2$  at 200 Hz. To complex immunological systems such as the tumor microenvironment, pathologist-proven IMC antibodies were stained and analyzed. We investigated the cellular phenotypes and biomarkers of a single tissue sample, observe each components' spatial distribution simultaneously, and compare the qualities of each. This unique and comprehensive analysis of a single tumor sample affords us to draw conclusions between the identification and spatial relationships of the significant cellular components within a tumor microenvironment.

**IMC analysis.** We require some other image processing and computational methods in order to quantify the .mcd imaging files (Fluidigm) yielded from IMC and to determine the overall spatial architecture of the tumor immune microenvironment.<sup>14</sup> We used the free, open-source, image-analyzing platform Fiji<sup>15, 16</sup> for cell segmentation and conversion of imaging data into flow cytometric data. The advantages offered by Fiji include a fast, robust, unsupervised, automated cell segmentation method requiring minimal expertise in computers. 32-bit TIFF stacked images were loaded in Fiji and we applied our novel method of automated cell segmentation that estimates cell boundaries by expanding the perimeter of their nuclei, identified by Cell ID Intercalator-iridium (191Ir). Once images from the IMC methodology are acquired, they can be quantified through FIJI's threshold and watershed tools. Protein expression data were then extracted at the single-cell level through mean intensity multiparametric measurements performed on individual

cells, and acquired single-cell data were transferred into additional cytometric analysis in FlowJo® V10 software (FlowJo, LLC, OR). All protein markers in quantified IMC data are adjusted with <sup>191</sup>Ir and <sup>193</sup>Ir nucleus intensities and normalized with CytoNorm<sup>17</sup> across IMC regions of interest (ROIs). CytoNorm is a normalization method for cytometry data applicable to large clinical studies, which is plugged-in FlowJo. CytoNorm allows reducing mass cytometry signal variability across multiple batches of barcoded samples. Normalized IMC data are combined by using FlowJo. Twelve cellular phenotypes in **Figure 1C** were manually defined: cancer cells (CD45-**Pan-cytokeratin(CK)**+E-cadherin+), cancer-associated fibroblasts (CAFs; CD45-Pan-CK-**Vim**+), endothelial cells (**CD31**+), B cells (CD19+**CD20**+CD45RA+), CD4 T cells (CD3+**CD4**+), Treg (CD4+**FoxP3**+), CD8 T cells (CD3+**CD8**+), CD8 memory T cells (CD8mem: CD3+**CD8**+**CD45RO**+), M1-like tumor-associated macrophages (TAMs; **CD68**+**Lysozyme**+CD163-), M2-like TAMs (**CD68**+**CD163**+Lysozyme-), Dendritic cells (**CD11c**+**HLA-DR**+CD3-CD20-), NK cells (**CD16**+CD3-CD20-), and stromal cells (CD45-Pan-CK-Vim-CD31-). Reference phenotypes were generated from quantified IMC data based on representative pathologist-proven IMC markers (bold characters). Pooling of downsampled IMC quantified data (20,000 cells in each sample x 34 samples (4 no ICB and 30 evaluable tumors) = 680,000 cells in **Figure 1**) with reference was used for clustering analysis using FlowJo (**Supplementary Figure 2**).

**CytoTOF experiments.** Single cells were stabilized for 6 hours in media at 37°C. Briefly, 0.5 x 10<sup>6</sup> cells from each sample were barcoded using the Cell-ID 20-Plex Pd Barcoding Kit (Fluidigm, Cat.No. 201060).<sup>18</sup> After washing, cells were resuspended in 1 mL Fix I Buffer (Fluidigm, Cat.No.201065), and incubated for 10 minutes at room temperature (RT). After washing twice

with 1 mL of 1xBarcode Perm Buffer (Fluidigm, Cat.No.201057), each sample was resuspended to be barcoded completely in 800  $\mu$ L Barcode Perm Buffer. Barcodes were resuspended completely in 100  $\mu$ L Barcode Perm Buffer and transferred to the appropriate samples. After mixing the sample immediately and completely, the samples were incubated for 30 minutes at RT. After washing twice with 1 mL of Maxpar<sup>®</sup> Cell Staining Buffer (Fluidigm, Cat.No.201068), the samples were resuspended in 100  $\mu$ L Maxpar<sup>®</sup> Cell Staining Buffer, and all barcoded samples were combined into one tube. Cells were washed and incubated with extracellular antibodies for 45 minutes on ice. After overnight at 4°C with resuspension in 1 $\times$  Fix I buffer, the samples were stained with intracellular antibodies against cells cytokines for 30 minutes at RT and washed. The samples were then stained with intracellular antibodies for 30 minutes at RT and washed. Ten minutes before finishing staining with intracellular antibodies, 0.125 nM Cell-ID<sup>™</sup> Intercalator-Ir (Fluidigm<sup>®</sup>, Cat.No.201192B) in Maxpar<sup>®</sup> Fix and Perm Buffer (Fluidigm<sup>®</sup>, Cat.No.201067) was added. After washing cells with PBS and MilliQ water, stained cells were analyzed on a mass cytometer (CyTOF3<sup>™</sup> mass cytometer, Fluidigm) at an event rate of 400 to 500 cells per second. All mass cytometry files were normalized together using the mass cytometry data normalization algorithm, which uses the intensity values of a sliding window of these bead standards to correct for instrument fluctuations over time and between samples. The bead standards were prepared immediately before analysis, and the mixture of beads and cells were filtered through a filter cap FACS tubes before analysis. All mass cytometry files were normalized together using the mass cytometry data normalization algorithm,<sup>19</sup> which used the intensity values of a sliding window of these bead standards to correct for instrument fluctuations over time and between samples. Barcodes were deconvoluted using the Debarcoder<sup>®</sup> software (Fluidigm<sup>®</sup>).<sup>18,20</sup>



**CyTOF analysis.** Total live nucleated cells were used for all analyses and visualized using by T-distributed Stochastic Neighbor Embedding (t-SNE)<sup>10, 11</sup> or Uniform Manifold Approximation and Projection (UMAP) for dimensionality reduction.<sup>12</sup> 20,000 immune cells were downsampled from each sample, and they were integrated into one file after the normalization with CytoNorm.<sup>17</sup> Each phenotype was manually defined in PBMCs and tumor single cells: CD4 T cells (CD45+CD3+CD4+CD8-CD19-), CD8 T cells (CD45+CD3+CD8+CD4-CD19-), double negative T cells (CD45+CD3+CD4-CD8-CD19-), naïve CD4 T cells (CD45+CD3+CD4+CD8-CD19-CD45RA+CD45RO-CCR7+), central memory CD4 T cells (CD4 Tcm: CD45+CD3+CD4+CD8-CD19-CD45RO+CD45RA-CCR7+), effector memory CD4 T cells (CD4 Tem: CD45+CD3+CD4+CD8-CD19-CD45RO+CD45RA-CCR7-), effector memory CD4 T re-expressing CD45RA cells (CD4 Temra: CD45+CD3+CD4+CD8-CD19-CD45RA+CD45RO-CCR7-), naïve CD8 T cells (CD45+CD3+CD8+CD4-CD19-CD45RA+CD45RO-CCR7+), central memory CD8 T cells (CD8 Tcm: CD45+CD3+CD8+CD4-CD19-CD45RO+CD45RA-CCR7+), effector memory CD8 T cells (CD8 Tem: CD45+CD3+CD8+CD4-CD19-CD45RO+CD45RA-CCR7-), effector memory CD8 T reexpressing CD45RA cells (CD8 Temra: CD45+CD3+CD8+CD4-CD19-CD45RA+CD45RO-CCR7-), B cells (CD45+CD19+CD3-), monocytes (CD45+CD3-CD19-HLA-DR+CD14+), tumor-associated macrophages (TAM; CD45+CD3-CD19-HLA-DR+CD68+CD11c-CD123-), conventional DC (CD45+CD3-CD19-HLA-DR+CD14-CD11c+), plasmacytoid dendritic cells (CD45+CD3-CD19-HLA-DR+CD11c-CD123+CD68-), and NK cells (CD45+CD3-CD19-HLA-DR-CD56+).

In BMDCs, each lineage was manually defined: hematopoietic stem and progenitor cells (HSPC: CD34+CD117+Lin-), premature B cells (CD45+CD19+CD20-CD3-), mature B cells

(CD45+CD19+CD20+CD3-), CD4 T cells (CD45+CD3+CD4+CD8-CD19-), CD8 T cells (CD45+CD3+CD8+CD4-CD19-), double-negative T cells (CD45+CD3+CD4-CD8-CD19-), naïve CD4 T cells (CD45+CD3+CD4+CD8-CD19-CD45RA+CD45RO-CCR7+), central memory CD4 T cells (CD4 Tem: CD45+CD3+CD4+CD8-CD19-CD45RO+CD45RA-CCR7+), effector memory CD4 T cells (CD4 Tem: CD45+CD3+CD4+CD8-CD19-CD45RO+CD45RA-CCR7-), effector memory CD4 T re-expressing CD45RA cells (CD4 Temra: CD45+CD3+CD4+CD8-CD19-CD45RA+CD45RO-CCR7-), naïve CD8 T cells (CD45+CD3+CD8+CD4-CD19-CD45RA+CD45RO-CCR7+), central memory CD8 T cells (CD8 Tem: CD45+CD3+CD8+CD4-CD19-CD45RO+CD45RA-CCR7+), effector memory CD8 T cells (CD8 Tem: CD45+CD3+CD8+CD4-CD19-CD45RO+CD45RA-CCR7-), effector memory CD8 T re-expressing CD45RA cells (CD8 Temra: CD45+CD3+CD8+CD4-CD19-CD45RA+CD45RO-CCR7-), myeloid cells (CD45+HLA-DR+CD3-CD19-, and NK cells (CD45+CD3-CD19-HLA-DR-CD56+). Given the large quantity of data resulting from the proposed experiments (640,000 cells in **Figure 4A**, 200,000 cells in **Figure 4C**, and 500,000 cells in **Figure 5C**), we used an efficient and comprehensive data analysis pipeline based on the Immune Reference Map framework.<sup>20-22</sup> Mapping of our data onto its interface enabled visualization and precise quantification of immune cells in any sample as a tSNE or UMAP plot, and generation of separate maps for defined groups of patients enables comparison of cellular networks between these groups. To improve efficiency and ease of display of our multiple proposed experiments, we generated the intuitive single-cell maps for each comparison (as in **Figures 1C, 4A, 4C, and 5C**). Cell frequencies or proportions were compared across groups of interest.<sup>20, 23, 24</sup> Based on the outcome of interest, statistically significant changes in cell frequencies for each cluster were shown in a single map with the directionality of change given by color. For deep phenotyping of T cells, Z

values of protein markers were calculated by subtracting average protein expression from raw data for each protein and dividing by its standard deviation. Mean metal intensities (MMI) of proteins were compared between T cells of interest and other representative T cell subpopulations (naïve T, Tcm, Tem, and Temra). Newly identified CD57<sup>+</sup> effector memory T cells were validated with flow cytometry gating in **Supplementary Figure 7**.

## REFERENCES for Supplementary Information

1. Lee HS, Hamaji M, Palivela N, et al. Prognostic Role of Programmed Cell Death 1 Ligand 1 in Resectable Pleural Mesothelioma. *Ann Thorac Surg* 2021;112:1575-1583.
2. Burt BM, Lee HS, Raghuram AC, et al. Preoperative prediction of unresectability in malignant pleural mesothelioma. *J Thorac Cardiovasc Surg* 2020;159:2512-2520.e2511.
3. Bueno R, Stawiski EW, Goldstein LD, et al. Comprehensive genomic analysis of malignant pleural mesothelioma identifies recurrent mutations, gene fusions and splicing alterations. *Nat Genet* 2016;48:407-416.
4. Hmeljak J, Sanchez-Vega F, Hoadley KA, et al. Integrative Molecular Characterization of Malignant Pleural Mesothelioma. *Cancer Disc* 2018;8:1548-1565.
5. Bott M, Brevet M, Taylor BS, et al. The nuclear deubiquitinase BAP1 is commonly inactivated by somatic mutations and 3p21.1 losses in malignant pleural mesothelioma. *Nat Genet* 2011;43:668-672.
6. Common Terminology Criteria for Adverse Events (CTCAE) (Version 4.03). Common Terminology Criteria for Adverse Events (CTCAE) (Version 4.03),. Available at [https://evs.nci.nih.gov/ftp1/CTCAE/CTCAE\\_4.03/CTCAE\\_4.03\\_2010-06-14\\_QuickReference\\_8.5x11.pdf](https://evs.nci.nih.gov/ftp1/CTCAE/CTCAE_4.03/CTCAE_4.03_2010-06-14_QuickReference_8.5x11.pdf).
7. Edition S, Edge S, Byrd D. AJCC cancer staging manual. *AJCC cancer staging manual* 2017.
8. Berzenji L, Van Schil PE, Carp L. The eighth TNM classification for malignant pleural mesothelioma. *Transl Lung Cancer Res* 2018;7:543.
9. Cottrell TR, Thompson ED, Forde PM, et al. Pathologic features of response to neoadjuvant anti-PD-1 in resected non-small-cell lung carcinoma: a proposal for quantitative immune-related pathologic response criteria (irPRC). *Ann Oncol* 2018;29:1853-1860.

10. Amir E-aD, Davis KL, Tadmor MD, et al. viSNE enables visualization of high dimensional single-cell data and reveals phenotypic heterogeneity of leukemia. *Nat Biotechnol* 2013;31:545-552.
11. van der Maaten LJP, Hinton GE. Visualizing High-Dimensional Data Using t-SNE. *J Mach Learn Res* 2008;9:2579-2605.
12. Becht E, McInnes L, Healy J, et al. Dimensionality reduction for visualizing single-cell data using UMAP. *Nat Biotechnol* 2018.
13. Jang HJ, Truong CY, Lo EM, et al. Inhibition of CDK4/6 Overcomes Primary Resistance to PD-1 Blockade in Malignant Mesothelioma. *Ann Thorac Surg* 2021;S0003-4975(21)01670-2. doi: 10.1016/j.athoracsur.2021.08.054.
14. Giesen C, Wang HA, Schapiro D, et al. Highly multiplexed imaging of tumor tissues with subcellular resolution by mass cytometry. *Nat Methods* 2014;11:417-422.
15. Schindelin J, Arganda-Carreras I, Frise E, et al. Fiji: an open-source platform for biological-image analysis. *Nat Methods* 2012;9:676-682.
16. Schwendy M, Unger RE, Bonn M, et al. Automated cell segmentation in FIJI® using the DRAQ5 nuclear dye. *BMC bioinformatics* 2019;20:39.
17. Van Gassen S, Gaudilliere B, Angst MS, et al. CytoNorm: A Normalization Algorithm for Cytometry Data. *Cytometry* 2020;97:268-278.
18. Zunder ER, Finck R, Behbehani GK, et al. Palladium-based mass tag cell barcoding with a doublet-filtering scheme and single-cell deconvolution algorithm. *Nat Protoc* 2015;10:316-333.
19. Finck R, Simonds EF, Jager A, et al. Normalization of mass cytometry data with bead standards. *Cytometry* 2013;83:483-494.

20. Lee HS, Jang HJ, Choi JM, et al. Comprehensive immunoproteogenomic analyses of malignant pleural mesothelioma. *JCI insight* 2018;3.
21. Spitzer MH, Gherardini PF, Fragiadakis GK, et al. IMMUNOLOGY. An interactive reference framework for modeling a dynamic immune system. *Science* 2015;349:1259425.
22. Spitzer MH, Carmi Y, Reticker-Flynn NE, et al. Systemic Immunity Is Required for Effective Cancer Immunotherapy. *Cell* 2017;168:487-502 e415.
23. Lee HS, Jang HJ, Shah R, et al. Genomic Analysis of Thymic Epithelial Tumors Identifies Novel Subtypes Associated with Distinct Clinical Features. *Clin Cancer Res* 2017;23:4855-4864.
24. Jang HJ, Lee HS, Ramos D, et al. Transcriptome-based molecular subtyping of non-small cell lung cancer may predict response to immune checkpoint inhibitors. *J Thorac Cardiovasc Surg* 2020;159:1598-1610.e1593.
